# Supplementary material for: Exploring acidity-dependent PCET pathways in imino-bipyridyl cobalt complexes
Source: Royal Society of Chemistry journal article supplement (doi:10.1039/d4dt03221g), 2025-01-01
Supplement: d4dt03221g1.pdf [file d4dt03221g1.pdf]

*Supporting Information for:*

## **Exploring Acidity-Dependent PCET Pathways in Imino-Bipyridyl Cobalt Complexes**

Jueun Lee,<sup>a</sup> Daeun Jung,<sup>a</sup> and Junhyeok Seo<sup>a,b,\*</sup>

<sup>a</sup>Department of Chemistry, Gwangju Institute of Science and Technology; Gwangju 61005,  
Republic of Korea

<sup>b</sup>Research Center for Innovative Energy and Carbon Optimized Synthesis for Chemicals(Inn-  
ECOSysChem), Gwangju Institute of Science and Technology; Gwangju 61005, Republic of  
Korea

| <b>Supplementary Information Contents</b>                                                                                                | <b>Page</b> |
|------------------------------------------------------------------------------------------------------------------------------------------|-------------|
| <b>Experimental details</b>                                                                                                              | S3          |
| <b>CV of Proton Sources with Intermediate Acidity</b>                                                                                    |             |
| S3                                                                                                                                       |             |
| <b>Figure S1.</b> CVs of ${}^4[1]^{2+}$ and ${}^4[2]^{2+}$ in the presence of 2-picoline·HBF <sub>4</sub> /2,6-lutidine·HBF <sub>4</sub> | S3          |
| <b>Correlation between hydricity and pK<sub>a</sub> of a proton source</b>                                                               | S4          |
| <b>Scheme S1.</b> Evolution of hydrogen considering metal hydride hydricity                                                              | S4          |
| <b>Calibration curve</b>                                                                                                                 | S4          |
| <b>Calculation of Faradaic efficiency</b>                                                                                                | S5          |
| <b>Figure S2.</b> Photographic depiction of the controlled potential electrochemistry setup                                              | S5          |
| <b>Figure S3.</b> Faradaic efficiency of ${}^4[1]^{2+}$ and ${}^4[2]^{2+}$                                                               | S6          |
| <b>Turnover frequency and Tafel plot</b>                                                                                                 | S6          |
| <b>Computational details</b>                                                                                                             | S7          |
| <b>Figure S4.</b> FOWA plots of ${}^4[1]^{2+}$ and ${}^4[2]^{2+}$                                                                        | S8          |
| <b>Figure S5.</b> Catalytic Tafel plots of performances for HER catalysts                                                                | S8          |
| <b>Table S1.</b> Details of catalytic performance of the reported proton reduction catalysts                                             | S9          |
| <b>Figure S6.</b> Energy profile and transition state for formation of ${}^4[1-H]^+$                                                     | S10         |

|                                                                                                 |     |
|-------------------------------------------------------------------------------------------------|-----|
| <b>Figure S7.</b> Energy profile and transition state for hydrogen evolution with $^3[1-H]^0$   | S10 |
| <b>Figure S8.</b> Temperature-dependent $^2H$ NMR spectra of $^3[2]^+$ with $Et_3N \cdot DBF_4$ | S11 |
| <b>Figure S9.</b> Energy profile and transition state for hydrogen evolution with $^2[2-H]^0$   | S11 |
| <b>References</b>                                                                               | S12 |
| <b>Cartesian coordinates of DFT-optimized structures</b>                                        | S14 |

## Experimental Details

### CV of Proton Sources with Intermediate Acidity

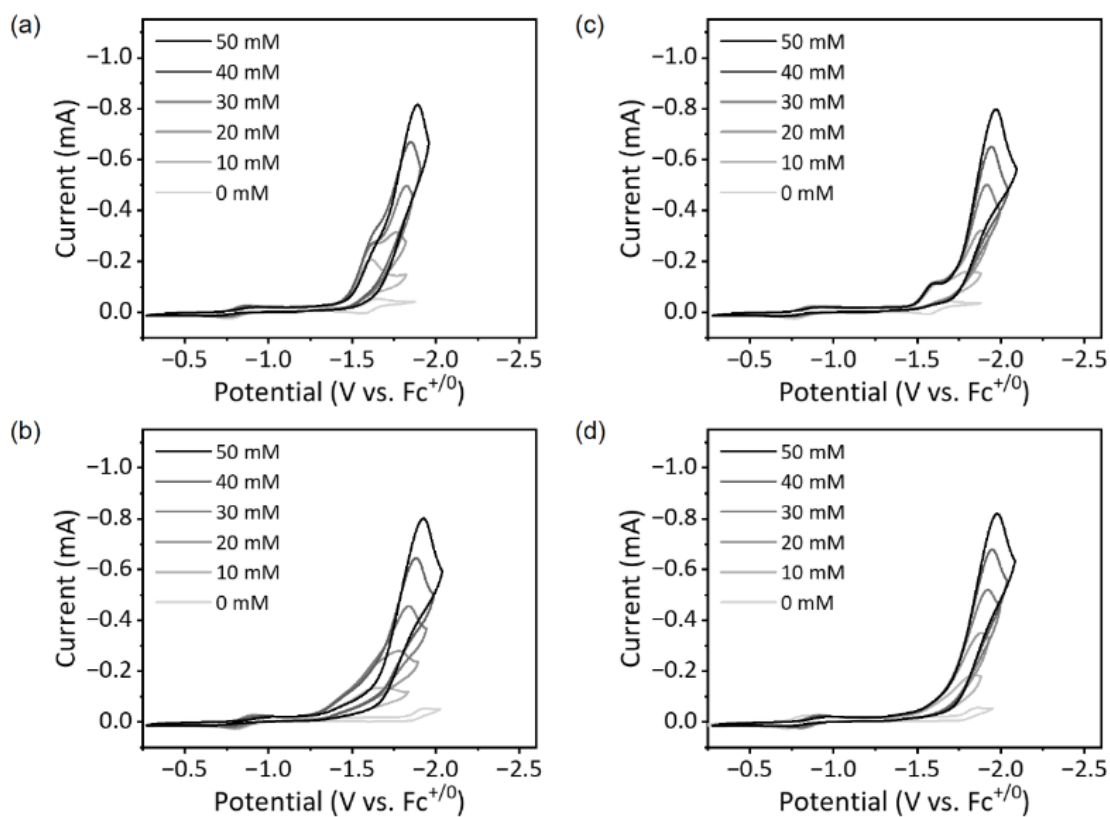

**Figure S1.** CVs of (a)  ${}^4[1]^{2+}$  and (b)  ${}^4[2]^{2+}$  in the presence of 2-picoline·HBF<sub>4</sub>, and (c)  ${}^4[1]^{2+}$  and (d)  ${}^4[2]^{2+}$  in the presence of 2,6-lutidine·HBF<sub>4</sub>. Experimental conditions: 2 mM of complex, 0-50 mM of proton source in CH<sub>3</sub>CN.

### Correlation between hydricity and $pK_a$ of a proton source

The hydricity of a metal hydride can be calculated from the redox potential of the complex, as reported by the Kubiak group,<sup>1</sup> which demonstrated the correlation between these two parameters. Furthermore, the process in which the metal hydride reacts with an external proton to form  $H_2$  can be depicted by Scheme S1.<sup>2</sup> Based on this, the appropriate proton source for HER can be considered using Eqn. 1, selecting one with a suitable  $pK_a$  for efficient hydrogen evolution.

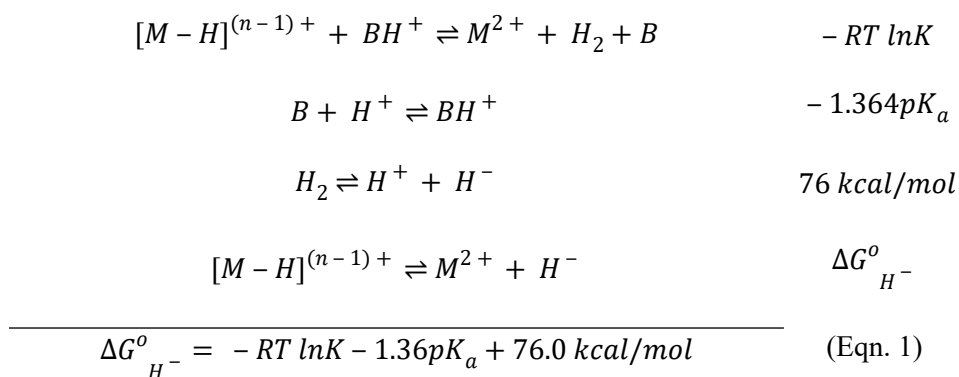

**Scheme S1.** Evolution of hydrogen considering metal hydride hydricity

### Calibration curve

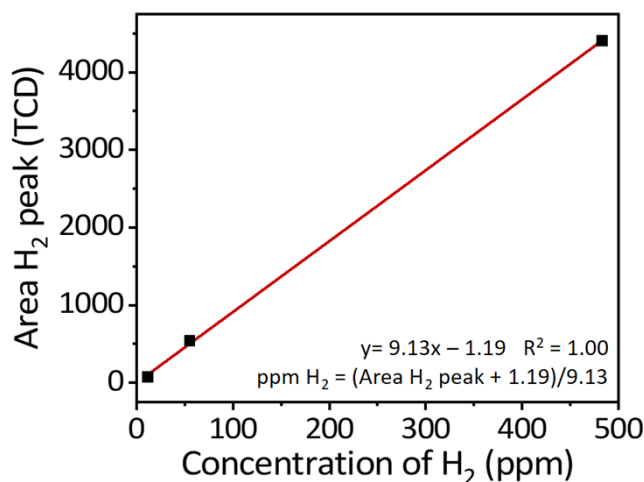

Calibration plots for measuring  $H_2$  produced during chronopotentiometry experiments, the gas was quantified by TCD detectors. Calibration is for 1 ml of reference gases.

### Calculation of Faradaic Efficiency (FE)

Chronoamperometry experiments were conducted three times in 4-neck pear shaped cells at constant currents for 1 h (Figure S2, S3). After chronoamperometry experiments, samples captured with a gas-tight syringe were injected into a gas chromatograph for analysis. Calibration curves were constructed using known amounts of H<sub>2</sub> with N<sub>2</sub> reference gas to quantify the concentration of gaseous products from respective chromatograms. The amount of gas produced was calculated from the concentration of gas using the ideal gas law, and Faradaic efficiency was determined using eqn.2

$$FE(\%) = \frac{z * F * n}{Q} \times 100 \text{ (Eqn.2)}$$

, where z is the number of electrons, n is the moles of analyte produced, F is the Faraday constant and Q is the specific charge passed during the chronopotentiometry experiments.

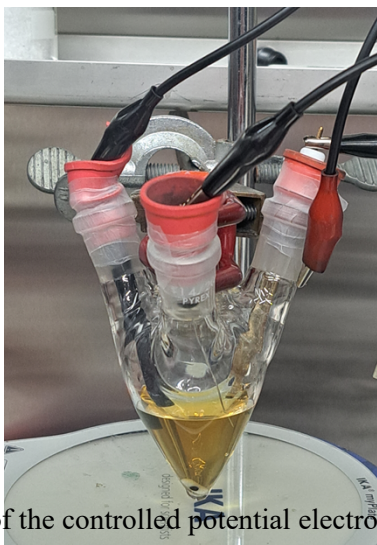

**Figure S2.** Photographic depiction of the controlled potential electrochemistry setup

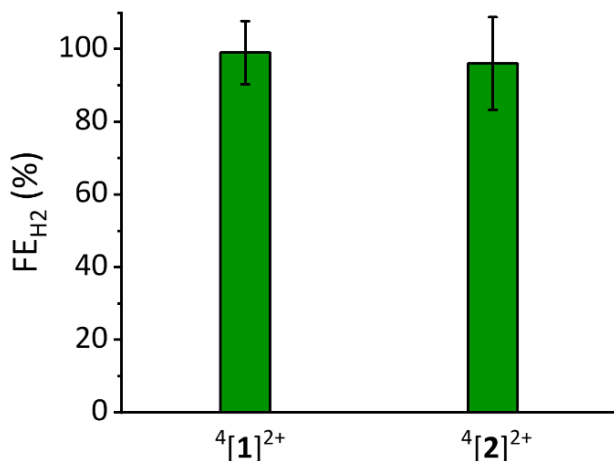

**Figure S3.** Faradaic efficiency values of <sup>4</sup>[1]<sup>2+</sup> and <sup>4</sup>[2]<sup>2+</sup>.

### Turnover Frequency and Tafel plot

Foot of the Wave Analysis (FOWA), developed by Savéant and Costentin, is a useful analytical method when an ideal S-shaped electrocatalytic wave cannot be achieved due to side phenomena such as substrate limitations, catalyst decomposition, product inhibition, or surface passivation.<sup>3</sup> <sup>4</sup>[1]<sup>2+</sup> followed an ET-CPET-PT process, while <sup>4</sup>[2]<sup>2+</sup> followed an ET-PT-ET-PT (ECEC) process. Therefore, the TOF values for both complexes were determined using the same method, eqn. 3.<sup>4</sup>

The benchmarking of complex <sup>4</sup>[1]<sup>2+</sup> and <sup>4</sup>[2]<sup>2+</sup> proceeded by comparing catalytic Tafel plots of other reported proton reduction catalysts in Figure S5. Each catalytic Tafel plot was constructed using equation from previously reported literature (Eqn. 4).<sup>5</sup> The TOF<sub>max</sub> values were obtained from the reported values,<sup>6-9</sup> and the thermodynamic potentials for H<sub>2</sub> evolution (E<sup>o</sup><sub>HA/H<sub>2</sub></sub>) were calculated using the acid dissociation constant (pK<sub>a</sub>) of the proton source at the solvent media (Eqn. 5).<sup>10</sup> The pK<sub>a</sub> values at the solvent media were taken from the reported literature.<sup>11, 12</sup> The E<sub>cat/2</sub> value of each catalyst were also obtained from the reported literature.

$$\frac{i}{i_p} = \frac{2.24 \sqrt{\frac{RT}{Fv}} \sqrt{k_{obs}}}{1 + \exp\left[\frac{F}{RT}(E - E_{redox})\right]} \quad (\text{Eqn.3})$$

$$TOF = \frac{TOF_{max}}{1 + \exp\left[\frac{F}{RT}\left(E_{HA^o/H_2} - E_{cat/2}\right)\right] \exp\left[-\frac{F}{RT}\eta\right]} \quad (Eqn.4)$$

$$E_{HA^o/H_2} = E_{H^+/H_2} - \frac{2.31RT}{F} \times pK_a \quad (Eqn.5)$$

### Computational details

The geometries were calculated in Orca 5.01 software<sup>13</sup> using the unrestricted B3LYP functional.<sup>14-17</sup> Optimization and Frequency calculation were proceeded using def2-SVP basis set<sup>18</sup> with the auxiliary def2/J basis set<sup>19</sup> was used for all atoms. Single point energy of optimized geometries was calculated using def2-TZVPP basis set<sup>18</sup> with the auxiliary def2/J basis set<sup>19</sup> for all atoms. Each structure was confirmed by a frequency calculation at the same level of theory to be a real local minimum on the potential energy surface. Solvation free energies in acetonitrile were calculated by using the polarizable continuum model (C-PCM) using Bondi atomic radii.<sup>20-22</sup> In the proposed mechanism, for  $\Delta G$ , values were calculated considering the dissociation of acetonitrile or variations depending on ET-PT and CPET. The calculations included the complexation energy correction to account for the differences in the number of molecules in the model before and after the reaction.<sup>23</sup> This involved taking into account relevant proton sources such as  $Et_3N/[Et_3NH]^+$ , and additionally generated  $H_2$ . The activation energy barrier was determined through the TS structure in the system, including the proton source. The reduction potentials of cobalt complexes were calculated by eqn.6 and 7.<sup>24</sup>

$$E^o = -\frac{\Delta G_{solv}^{redox}}{F} \left( F = 23.1 \frac{kcal}{mol * V} \right) \quad (Eqn. 6)$$

$$\Delta G_{solv}^{redox} = \Delta G_{solv}^{red} - \Delta G_{solv}^{ox} \quad (Eqn. 7)$$

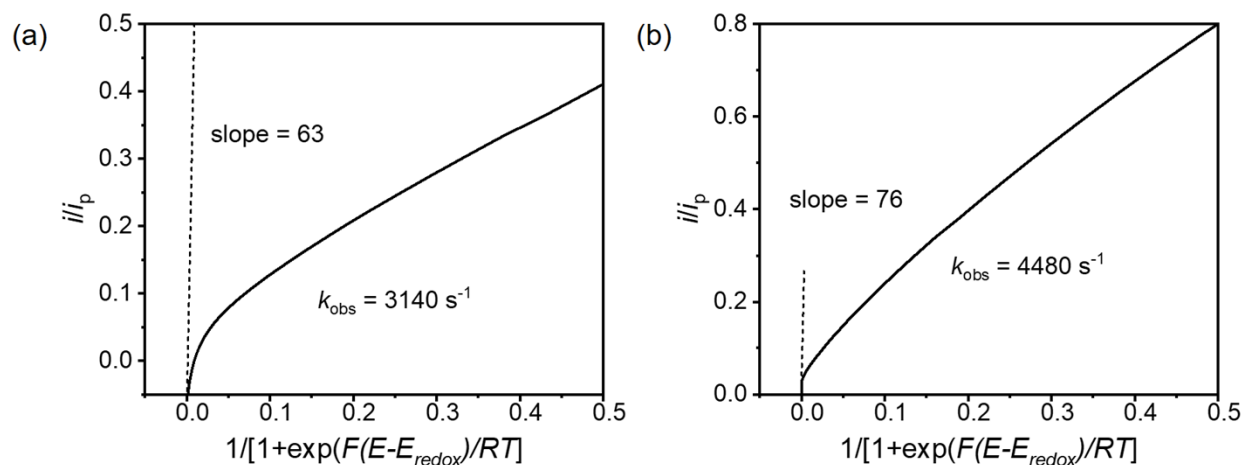

**Figure S4.** FOWA plots of (a)  $4[1]^{2+}$  and (b)  $4[2]^{2+}$ .

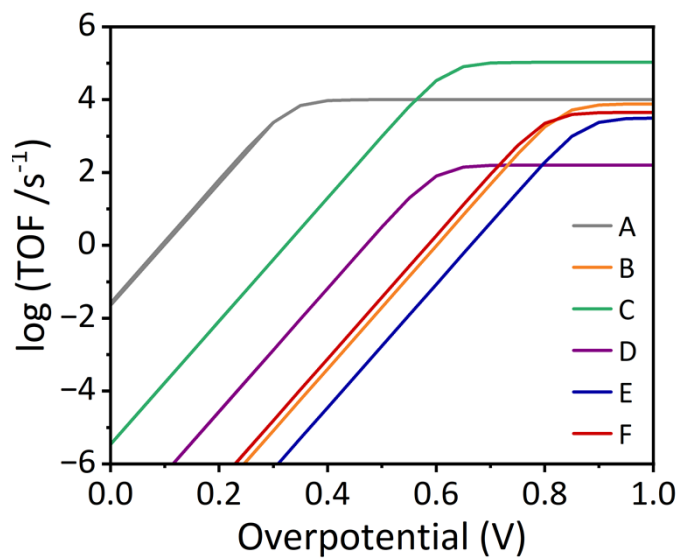

**Figure S5.** Compared Tafel plots of Co complexes of this work and previously reported in literatures. (a)  $[\text{Co}(\text{dmgH})_2(\text{Py})](\text{Cl})^6$  (b)  $[\text{Co}(\text{bapbpy})\text{Cl}]^+$ ,<sup>7</sup> (c)  $[\text{Ni}(\text{P}^{\text{Ph}}_2\text{N}^{\text{Ph}})_2](\text{OTf})_2$ ,<sup>8</sup> (d)  $4[1]^{2+}$ , (e)  $4[2]^{2+}$ .



**Table S1.** Compared catalytic parameters of known HER catalysts,  $^4[1]^{2+}$ , and  $^4[2]^{2+}$ .

|   | Catalyst                                                                  | $E_{\text{cat}/2}$ | Solvent                | Proton source                               | $E_{\text{HA}/\text{H}_2}^{\circ}$ | $\text{TOF}_{\text{max}}$<br>( $\text{s}^{-1}$ ) | Ref.      |
|---|---------------------------------------------------------------------------|--------------------|------------------------|---------------------------------------------|------------------------------------|--------------------------------------------------|-----------|
| A | $[\text{Co}(\text{dmgH})_2(\text{Py})](\text{Cl})$                        | -1.53 V            | $\text{CH}_3\text{CN}$ | $[\text{Et}_3\text{NH}]^+$                  | -1.20 V                            | 10,000                                           | 6         |
| B | $[\text{Co}(\text{bapbpy})\text{Cl}]^+$                                   | -1.65 V            | $\text{CH}_3\text{CN}$ | 1M $\text{HBF}_4$                           | -0.82 V                            | 7,600                                            | 7         |
| C | $[\text{Ni}(\text{P}^{\text{Ph}}_2\text{N}^{\text{Ph}})_2](\text{OTf})_2$ | -1.13 V            | $\text{CH}_3\text{CN}$ | $[\text{DMFH}]^+/\text{H}_2\text{O}$        | -0.51 V                            | 106,000                                          | 8         |
| D | Ni(PNP)                                                                   | -1.83 V            | $\text{CH}_3\text{CN}$ | Acetic acid                                 | -1.23 V                            | 160                                              | 9         |
| E | $^4[1]^{2+}$                                                              | -2.01 V            | $\text{CH}_3\text{CN}$ | 50mM $\text{Et}_3\text{N}\cdot\text{HBF}_4$ | -1.14 V                            | 3,140                                            | This work |
| F | $^4[2]^{2+}$                                                              | -1.93 V            | $\text{CH}_3\text{CN}$ | 50mM $\text{Et}_3\text{N}\cdot\text{HBF}_4$ | -1.14 V                            | 4,480                                            | This work |

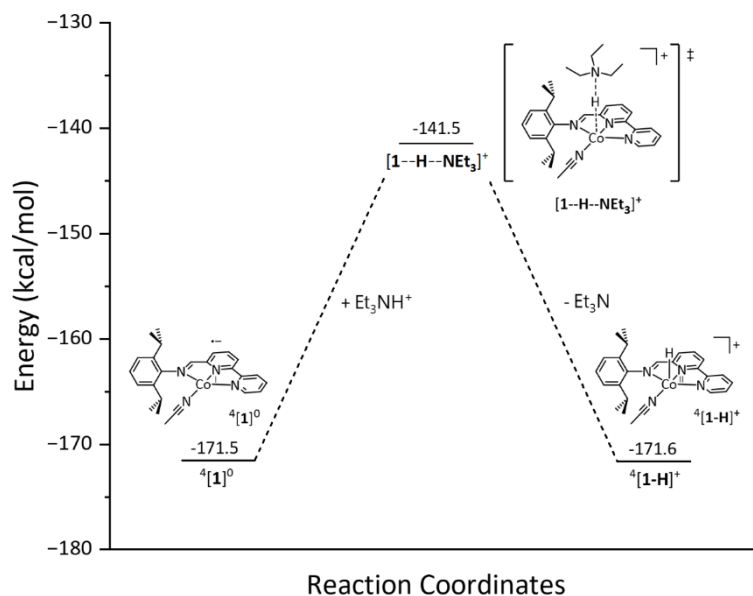

**Figure S6.** Activation barrier for the formation of  ${}^4[1-H]^+$ . B3LYP/Def2-SVP//Def2-TZVPPD solution phase calculations in  $CH_3CN$ .

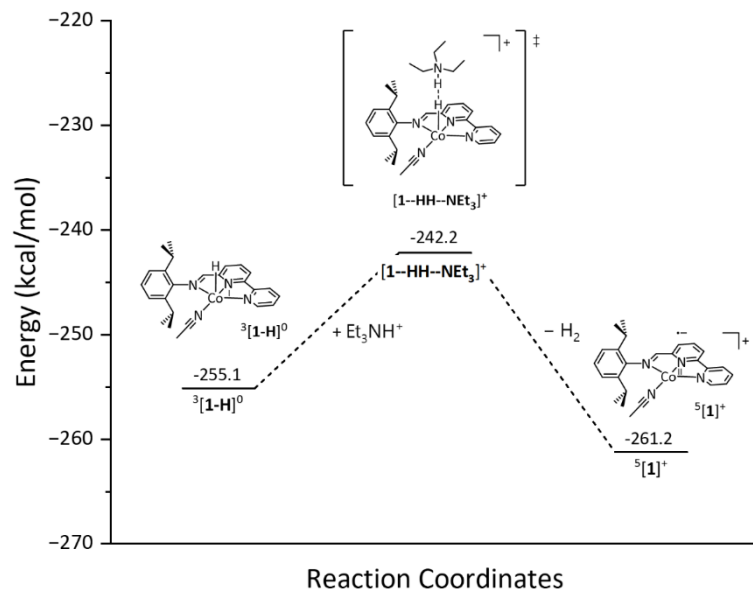

**Figure S7.** Activation barrier for the formation of  $H_2$  from  ${}^3[1-H]^0$ . B3LYP/Def2-SVP//Def2-TZVPPD solution phase calculations in  $CH_3CN$ .

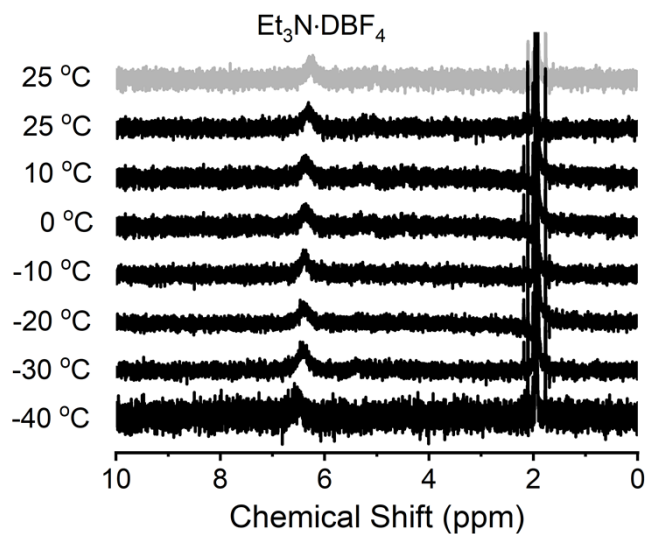

**Figure S8.** Temperature-dependent  $^2\text{H}$  NMR spectra of  $^3[2]^+$  with  $\text{Et}_3\text{N}\cdot\text{DBF}_4$  in  $\text{CH}_3\text{CN}$ , a free  $\text{Et}_3\text{N}\cdot\text{DBF}_4$  peak (gray) is given for comparison.

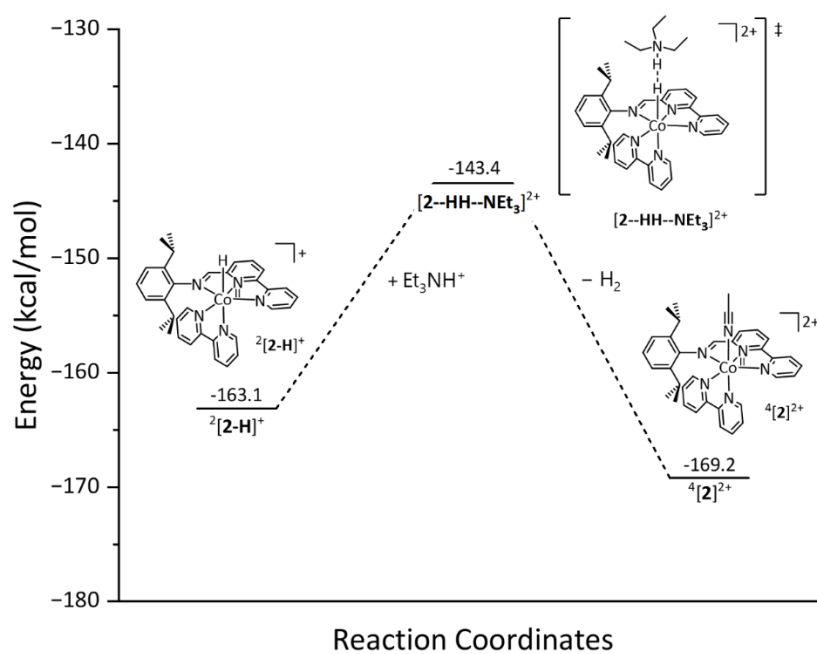

**Figure S9.** Activation barrier for the formation of  $\text{H}_2$  from  $^2[2-\text{H}]^+$ . B3LYP/Def2-SVP//Def2-TZVPPD solution phase calculations in  $\text{CH}_3\text{CN}$ .

## Reference

1. K. M. Waldie, A. L. Ostericher, M. H. Reineke, A. F. Sasayama and C. P. Kubiak, *Acs Catal*, 2018, **8**, 1313-1324.
2. A. L. Ostericher, K. M. Waldie and C. P. Kubiak, *Acs Catal*, 2018, **8**, 9596-9603.
3. C. Costentin, S. Drouet, M. Robert and J. M. Savéant, *J Am Chem Soc*, 2012, **134**, 11235-11242.
4. V. C. C. Wang and B. A. Johnson, *Acs Catal*, 2019, **9**, 7109-7123.
5. E. S. Rountree, B. D. McCarthy, T. T. Eisenhart and J. L. Dempsey, *Inorg Chem*, 2014, **53**, 9983-10002.
6. M. Razavet, V. Artero and M. Fontecave, *Inorg Chem*, 2005, **44**, 4786-4795.
7. N. Queyriaux, D. Y. Sun, J. Fize, J. Pecaut, M. J. Field, M. Chavarot-Kerlidou and V. Artero, *J Am Chem Soc*, 2020, **142**, 274-282.
8. M. L. Helm, M. P. Stewart, R. M. Bullock, M. R. DuBois and D. L. DuBois, *Science*, 2011, **333**, 863-866.
9. S. Norouziyanlakvan, G. K. Rao, J. Ovens, B. Gabidullin and D. Richeson, *Chem-Eur J*, 2021, **27**, 13518-13522.
10. V. Fourmond, P. A. Jacques, M. Fontecave and V. Artero, *Inorg Chem*, 2010, **49**, 10338-10347.
11. N. Elgrishi, D. A. Kurtz and J. L. Dempsey, *J Am Chem Soc*, 2017, **139**, 239-244.
12. B. D. McCarthy, D. J. Martin, E. S. Rountree, A. C. Ullman and J. L. Dempsey, *Inorg Chem*, 2014, **53**, 8350-8361.
13. F. Neese, *Wires Comput Mol Sci*, 2012, **2**, 73-78.
14. A. D. Becke, *J. Chem. Phys.*, 1993, **98**, 1372-1377.
15. A. D. Becke, *J. Chem. Phys.*, 1993, **98**, 5648-5652.
16. A. D. Becke, *Phys. Rev. A*, 1988, **38**, 3098-3100.
17. W. Y. Chengteh Lee, Robert G. Parr, *Phys. Rev. B*, 1988, **37**, 785-789.
18. F. Weigend and R. Ahlrichs, *Phys Chem Chem Phys*, 2005, **7**, 3297-3305.
19. F. Weigend, *Phys Chem Chem Phys*, 2006, **8**, 1057-1065.

20. V. Barone and M. Cossi, *J Phys Chem A*, 1998, **102**, 1995-2001.
21. M. Cossi, N. Rega, G. Scalmani and V. Barone, *J Comput Chem*, 2003, **24**, 669-681.
22. A. Bondi, *The Journal of Physical Chemistry*, 1964, **68**, 441-451.
23. S. C. L. Kamerlin and A. Warshel, *Faraday Discuss*, 2010, **145**, 71-106.
24. T. Fogeron, J. P. Porcher, M. Gomez-Mingot, T. K. Todorova, L. M. Chamoreau, C. Mellot-Draznieks, Y. Li and M. Fontecave, *Dalton T*, 2016, **45**, 14754-14763.

## Cartesian coordinates of DFT-optimized structures

(Format)

Structure name

Spin multiplicity / Charge

Atom number XYZ

$4[1]^{2+}$

Spin multiplicity : Quartet / Charge : 2+

|    |              |              |              |
|----|--------------|--------------|--------------|
| 27 | 9.068980000  | 10.473153000 | 2.559508000  |
| 7  | 8.099341000  | 11.416578000 | 0.835982000  |
| 7  | 7.192386000  | 9.551994000  | 2.435925000  |
| 7  | 8.950505000  | 9.140515000  | 4.412649000  |
| 7  | 9.828854000  | 8.993270000  | 1.189483000  |
| 7  | 11.004297000 | 11.243822000 | 2.781117000  |
| 7  | 8.395432000  | 12.218288000 | 3.634402000  |
| 6  | 8.638931000  | 12.380695000 | 0.083542000  |
| 1  | 9.613671000  | 12.763528000 | 0.399712000  |
| 6  | 8.003839000  | 12.885863000 | -1.053802000 |
| 1  | 8.481529000  | 13.672530000 | -1.640857000 |
| 6  | 6.760239000  | 12.361955000 | -1.408962000 |
| 1  | 6.231085000  | 12.729505000 | -2.291344000 |
| 6  | 6.192923000  | 11.358279000 | -0.619823000 |
| 1  | 5.219772000  | 10.940346000 | -0.879440000 |
| 6  | 6.891391000  | 10.903279000 | 0.504127000  |
| 6  | 6.376492000  | 9.850464000  | 1.421141000  |
| 6  | 5.138182000  | 9.193703000  | 1.294742000  |

|   |              |              |              |
|---|--------------|--------------|--------------|
| 1 | 4.461856000  | 9.424569000  | 0.471569000  |
| 6 | 4.782357000  | 8.239234000  | 2.247318000  |
| 1 | 3.825071000  | 7.719578000  | 2.166219000  |
| 6 | 5.649929000  | 7.953749000  | 3.309542000  |
| 1 | 5.395192000  | 7.217811000  | 4.074770000  |
| 6 | 6.862910000  | 8.644075000  | 3.365656000  |
| 6 | 7.864452000  | 8.459114000  | 4.434610000  |
| 1 | 7.639230000  | 7.737368000  | 5.233422000  |
| 6 | 9.910494000  | 8.984853000  | 5.473241000  |
| 6 | 9.753503000  | 9.730834000  | 6.667717000  |
| 6 | 10.726831000 | 9.576514000  | 7.667885000  |
| 1 | 10.623365000 | 10.133446000 | 8.602192000  |
| 6 | 8.562887000  | 10.655927000 | 6.913372000  |
| 1 | 8.042384000  | 10.798780000 | 5.956287000  |
| 6 | 7.556203000  | 10.020819000 | 7.892760000  |
| 1 | 7.189783000  | 9.048506000  | 7.525731000  |
| 1 | 6.685057000  | 10.682313000 | 8.032718000  |
| 1 | 8.016354000  | 9.854293000  | 8.881148000  |
| 6 | 8.994097000  | 12.051082000 | 7.398265000  |
| 1 | 9.457801000  | 12.014632000 | 8.397351000  |
| 1 | 8.116713000  | 12.714722000 | 7.469260000  |
| 1 | 9.716495000  | 12.512159000 | 6.705756000  |
| 6 | 10.207596000 | 8.251427000  | 0.387694000  |
| 6 | 10.683430000 | 7.312434000  | -0.611254000 |
| 1 | 9.993888000  | 7.301785000  | -1.469240000 |
| 1 | 10.733946000 | 6.304508000  | -0.171213000 |

|   |              |              |              |
|---|--------------|--------------|--------------|
| 1 | 11.686517000 | 7.611835000  | -0.951686000 |
| 6 | 12.073467000 | 11.663014000 | 2.911336000  |
| 6 | 13.415348000 | 12.187963000 | 3.078320000  |
| 1 | 13.364277000 | 13.252730000 | 3.353342000  |
| 1 | 13.974334000 | 12.078865000 | 2.136201000  |
| 1 | 13.930331000 | 11.628835000 | 3.874767000  |
| 6 | 7.979649000  | 13.216960000 | 4.041941000  |
| 6 | 7.455130000  | 14.473413000 | 4.546457000  |
| 1 | 7.930336000  | 15.311584000 | 4.014217000  |
| 1 | 7.667871000  | 14.557487000 | 5.622832000  |
| 1 | 6.366720000  | 14.510513000 | 4.386190000  |
| 6 | 11.818131000 | 8.725554000  | 7.497802000  |
| 1 | 12.562335000 | 8.621880000  | 8.292086000  |
| 6 | 11.952706000 | 8.002839000  | 6.312762000  |
| 1 | 12.802884000 | 7.327655000  | 6.188719000  |
| 6 | 11.011310000 | 8.115455000  | 5.278396000  |
| 6 | 11.161359000 | 7.263807000  | 4.021019000  |
| 1 | 10.436317000 | 7.629489000  | 3.281855000  |
| 6 | 10.809360000 | 5.791400000  | 4.309972000  |
| 1 | 11.499207000 | 5.356671000  | 5.052675000  |
| 1 | 10.880708000 | 5.189091000  | 3.389173000  |
| 1 | 9.784920000  | 5.692347000  | 4.704313000  |
| 6 | 12.554869000 | 7.385577000  | 3.381605000  |
| 1 | 13.344537000 | 6.977550000  | 4.033516000  |
| 1 | 12.587142000 | 6.821940000  | 2.434833000  |
| 1 | 12.805112000 | 8.435286000  | 3.160056000  |



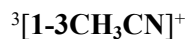

Spin multiplicity : Triplet / Charge : 1+

|    |              |              |              |
|----|--------------|--------------|--------------|
| 27 | 8.975567000  | 10.428261000 | 2.712325000  |
| 7  | 8.058426000  | 11.324212000 | 0.814478000  |
| 7  | 7.173482000  | 9.519081000  | 2.499972000  |
| 7  | 8.952653000  | 9.127041000  | 4.401349000  |
| 7  | 10.047054000 | 9.205677000  | 1.254141000  |
| 7  | 10.905646000 | 11.304031000 | 3.071936000  |
| 7  | 8.212753000  | 12.288870000 | 3.570976000  |
| 6  | 8.592829000  | 12.252328000 | 0.015110000  |
| 1  | 9.582836000  | 12.626016000 | 0.296378000  |
| 6  | 7.944068000  | 12.736510000 | -1.122558000 |
| 1  | 8.420200000  | 13.495667000 | -1.746544000 |
| 6  | 6.680713000  | 12.222432000 | -1.429990000 |
| 1  | 6.135171000  | 12.572007000 | -2.310192000 |
| 6  | 6.119880000  | 11.254157000 | -0.597384000 |
| 1  | 5.134553000  | 10.843778000 | -0.821410000 |
| 6  | 6.837877000  | 10.819296000 | 0.528663000  |
| 6  | 6.329904000  | 9.792339000  | 1.480084000  |
| 6  | 5.100655000  | 9.145927000  | 1.366017000  |
| 1  | 4.421829000  | 9.366869000  | 0.542113000  |
| 6  | 4.740178000  | 8.188390000  | 2.344070000  |
| 1  | 3.779933000  | 7.672413000  | 2.270538000  |
| 6  | 5.608503000  | 7.911251000  | 3.388468000  |
| 1  | 5.356514000  | 7.176088000  | 4.156931000  |
| 6  | 6.844361000  | 8.596789000  | 3.453335000  |

|   |              |              |              |
|---|--------------|--------------|--------------|
| 6 | 7.840075000  | 8.413250000  | 4.468303000  |
| 1 | 7.665822000  | 7.690196000  | 5.275585000  |
| 6 | 9.942790000  | 8.934341000  | 5.409701000  |
| 6 | 9.934344000  | 9.755002000  | 6.569188000  |
| 6 | 10.941351000 | 9.572149000  | 7.529545000  |
| 1 | 10.942089000 | 10.191716000 | 8.430372000  |
| 6 | 8.831138000  | 10.783524000 | 6.803864000  |
| 1 | 8.325513000  | 10.933269000 | 5.840385000  |
| 6 | 7.780884000  | 10.250918000 | 7.798465000  |
| 1 | 7.341988000  | 9.302531000  | 7.449470000  |
| 1 | 6.961205000  | 10.977877000 | 7.927951000  |
| 1 | 8.230225000  | 10.068676000 | 8.789639000  |
| 6 | 9.367307000  | 12.152684000 | 7.253643000  |
| 1 | 9.828276000  | 12.109579000 | 8.254315000  |
| 1 | 8.544277000  | 12.884868000 | 7.305318000  |
| 1 | 10.121778000 | 12.540413000 | 6.550139000  |
| 6 | 10.539098000 | 8.580911000  | 0.413702000  |
| 6 | 11.153991000 | 7.795302000  | -0.644050000 |
| 1 | 10.836584000 | 8.179571000  | -1.625559000 |
| 1 | 10.846340000 | 6.742354000  | -0.551800000 |
| 1 | 12.250076000 | 7.859156000  | -0.566916000 |
| 6 | 11.944440000 | 11.776623000 | 3.261704000  |
| 6 | 13.250286000 | 12.368644000 | 3.502469000  |
| 1 | 13.151662000 | 13.460518000 | 3.600856000  |
| 1 | 13.923379000 | 12.140068000 | 2.662039000  |
| 1 | 13.677859000 | 11.958590000 | 4.430283000  |

|   |              |              |             |
|---|--------------|--------------|-------------|
| 6 | 7.740007000  | 13.275130000 | 3.948618000 |
| 6 | 7.142275000  | 14.512936000 | 4.422542000 |
| 1 | 7.639245000  | 15.372559000 | 3.947283000 |
| 1 | 7.258181000  | 14.586651000 | 5.514688000 |
| 1 | 6.071047000  | 14.529813000 | 4.169565000 |
| 6 | 11.939070000 | 8.610633000  | 7.361648000 |
| 1 | 12.714695000 | 8.483073000  | 8.122154000 |
| 6 | 11.937913000 | 7.811036000  | 6.218213000 |
| 1 | 12.717795000 | 7.054745000  | 6.093726000 |
| 6 | 10.953717000 | 7.953681000  | 5.227243000 |
| 6 | 10.965717000 | 7.037201000  | 4.006079000 |
| 1 | 10.254911000 | 7.457829000  | 3.281892000 |
| 6 | 10.473426000 | 5.622214000  | 4.366395000 |
| 1 | 11.143406000 | 5.142207000  | 5.099945000 |
| 1 | 10.440076000 | 4.980294000  | 3.469777000 |
| 1 | 9.461895000  | 5.648481000  | 4.802677000 |
| 6 | 12.338663000 | 6.983854000  | 3.314949000 |
| 1 | 13.104427000 | 6.510619000  | 3.951629000 |
| 1 | 12.275719000 | 6.393726000  | 2.385457000 |
| 1 | 12.694002000 | 7.993198000  | 3.051684000 |

$^5[1-2\text{CH}_3\text{CN}]^+$

Spin multiplicity : Quintet / Charge : 1+

|    |              |              |              |
|----|--------------|--------------|--------------|
| 27 | 8.707592000  | 9.829905000  | 2.948162000  |
| 7  | 7.527524000  | 10.930650000 | 1.334408000  |
| 7  | 6.953828000  | 8.838850000  | 2.755046000  |
| 7  | 8.969096000  | 8.383576000  | 4.436223000  |
| 7  | 10.241221000 | 9.684602000  | 1.559492000  |
| 7  | 9.113204000  | 11.674396000 | 3.796291000  |
| 6  | 7.922835000  | 12.013265000 | 0.655108000  |
| 1  | 8.902467000  | 12.423589000 | 0.918292000  |
| 6  | 7.144177000  | 12.604533000 | -0.340634000 |
| 1  | 7.507949000  | 13.488238000 | -0.868689000 |
| 6  | 5.901349000  | 12.035087000 | -0.635573000 |
| 1  | 5.260203000  | 12.465385000 | -1.408951000 |
| 6  | 5.486633000  | 10.905896000 | 0.070407000  |
| 1  | 4.522262000  | 10.444421000 | -0.145420000 |
| 6  | 6.327052000  | 10.371893000 | 1.058478000  |
| 6  | 5.991474000  | 9.175549000  | 1.873559000  |
| 6  | 4.813178000  | 8.441960000  | 1.776806000  |
| 1  | 4.032169000  | 8.714213000  | 1.067238000  |
| 6  | 4.648853000  | 7.318623000  | 2.632558000  |
| 1  | 3.732894000  | 6.725868000  | 2.572655000  |
| 6  | 5.638266000  | 6.977856000  | 3.536881000  |
| 1  | 5.524515000  | 6.118443000  | 4.202348000  |
| 6  | 6.821210000  | 7.762525000  | 3.602574000  |
| 6  | 7.914973000  | 7.553997000  | 4.485471000  |

|   |              |              |              |
|---|--------------|--------------|--------------|
| 1 | 7.884632000  | 6.724403000  | 5.201725000  |
| 6 | 10.034824000 | 8.211972000  | 5.363986000  |
| 6 | 9.963011000  | 8.829666000  | 6.642620000  |
| 6 | 11.032110000 | 8.652646000  | 7.534744000  |
| 1 | 10.987232000 | 9.113204000  | 8.525116000  |
| 6 | 8.742138000  | 9.645426000  | 7.064014000  |
| 1 | 8.187297000  | 9.888696000  | 6.145483000  |
| 6 | 7.802000000  | 8.819788000  | 7.964155000  |
| 1 | 7.474224000  | 7.894326000  | 7.465119000  |
| 1 | 6.902741000  | 9.402145000  | 8.227027000  |
| 1 | 8.306395000  | 8.535607000  | 8.903349000  |
| 6 | 9.110677000  | 10.975600000 | 7.743067000  |
| 1 | 9.584073000  | 10.820673000 | 8.726554000  |
| 1 | 8.204031000  | 11.580408000 | 7.909785000  |
| 1 | 9.805892000  | 11.566834000 | 7.125624000  |
| 6 | 11.077168000 | 9.612406000  | 0.764479000  |
| 6 | 12.123110000 | 9.526672000  | -0.237189000 |
| 1 | 12.355109000 | 10.534321000 | -0.615107000 |
| 1 | 11.782144000 | 8.893188000  | -1.070697000 |
| 1 | 13.026354000 | 9.085201000  | 0.211231000  |
| 6 | 9.328569000  | 12.708365000 | 4.265997000  |
| 6 | 9.592849000  | 14.008328000 | 4.853238000  |
| 1 | 9.089506000  | 14.788705000 | 4.261754000  |
| 1 | 10.677704000 | 14.196275000 | 4.858810000  |
| 1 | 9.214187000  | 14.028585000 | 5.886745000  |
| 6 | 12.152249000 | 7.897466000  | 7.183820000  |

|   |              |             |             |
|---|--------------|-------------|-------------|
| 1 | 12.974095000 | 7.770364000 | 7.894261000 |
| 6 | 12.219214000 | 7.307359000 | 5.920980000 |
| 1 | 13.099330000 | 6.716970000 | 5.652562000 |
| 6 | 11.176026000 | 7.451614000 | 4.993050000 |
| 6 | 11.259524000 | 6.760998000 | 3.634095000 |
| 1 | 10.488414000 | 7.216764000 | 2.995723000 |
| 6 | 10.926254000 | 5.261060000 | 3.752811000 |
| 1 | 11.657523000 | 4.743363000 | 4.396915000 |
| 1 | 10.947255000 | 4.777255000 | 2.761696000 |
| 1 | 9.925754000  | 5.103680000 | 4.186667000 |
| 6 | 12.614200000 | 6.967914000 | 2.936486000 |
| 1 | 13.435763000 | 6.461850000 | 3.469703000 |
| 1 | 12.584176000 | 6.553251000 | 1.915345000 |
| 1 | 12.870048000 | 8.037269000 | 2.862149000 |

$^5[1]^+$

Spin multiplicity : Quintet / Charge : 1+

|    |             |              |              |
|----|-------------|--------------|--------------|
| 27 | 8.239440000 | 9.956643000  | 3.249858000  |
| 7  | 7.362885000 | 10.811931000 | 1.467860000  |
| 7  | 6.673309000 | 8.783240000  | 2.917323000  |
| 7  | 8.613661000 | 8.462015000  | 4.605941000  |
| 7  | 9.655800000 | 11.363231000 | 3.628729000  |
| 6  | 7.823900000 | 11.859759000 | 0.767449000  |
| 1  | 8.770376000 | 12.292559000 | 1.102569000  |
| 6  | 7.144040000 | 12.384079000 | -0.330054000 |
| 1  | 7.557592000 | 13.237182000 | -0.871121000 |
| 6  | 5.933758000 | 11.792730000 | -0.708134000 |
| 1  | 5.369388000 | 12.176616000 | -1.561426000 |
| 6  | 5.452678000 | 10.701124000 | 0.015073000  |
| 1  | 4.513527000 | 10.222382000 | -0.265016000 |
| 6  | 6.191407000 | 10.222242000 | 1.104088000  |
| 6  | 5.797490000 | 9.049800000  | 1.924669000  |
| 6  | 4.683321000 | 8.244506000  | 1.729848000  |
| 1  | 3.969062000 | 8.446003000  | 0.931279000  |
| 6  | 4.500189000 | 7.128494000  | 2.593123000  |
| 1  | 3.627805000 | 6.484868000  | 2.457700000  |
| 6  | 5.424130000 | 6.843363000  | 3.584521000  |
| 1  | 5.303555000 | 5.975626000  | 4.237491000  |
| 6  | 6.550945000 | 7.691912000  | 3.740015000  |
| 6  | 7.630152000 | 7.547642000  | 4.652992000  |
| 1  | 7.663908000 | 6.713578000  | 5.362209000  |

|   |              |              |             |
|---|--------------|--------------|-------------|
| 6 | 9.720626000  | 8.365199000  | 5.496721000 |
| 6 | 9.592185000  | 8.802122000  | 6.842511000 |
| 6 | 10.710108000 | 8.703019000  | 7.685890000 |
| 1 | 10.625521000 | 9.027415000  | 8.726770000 |
| 6 | 8.286259000  | 9.377574000  | 7.388177000 |
| 1 | 7.588151000  | 9.470501000  | 6.543736000 |
| 6 | 7.638293000  | 8.435165000  | 8.419695000 |
| 1 | 7.450416000  | 7.437876000  | 7.990384000 |
| 1 | 6.674468000  | 8.843541000  | 8.767004000 |
| 1 | 8.285395000  | 8.305172000  | 9.303537000 |
| 6 | 8.474818000  | 10.790406000 | 7.970442000 |
| 1 | 9.135093000  | 10.786197000 | 8.853493000 |
| 1 | 7.503615000  | 11.206747000 | 8.285755000 |
| 1 | 8.911039000  | 11.474873000 | 7.224792000 |
| 6 | 10.471935000 | 12.143468000 | 3.878729000 |
| 6 | 11.495931000 | 13.118606000 | 4.192476000 |
| 1 | 11.160955000 | 14.118013000 | 3.874230000 |
| 1 | 12.424940000 | 12.856237000 | 3.662767000 |
| 1 | 11.679930000 | 13.120027000 | 5.277978000 |
| 6 | 11.927934000 | 8.203504000  | 7.222610000 |
| 1 | 12.785798000 | 8.133973000  | 7.897440000 |
| 6 | 12.046799000 | 7.797539000  | 5.892661000 |
| 1 | 13.003918000 | 7.408441000  | 5.534244000 |
| 6 | 10.959249000 | 7.870894000  | 5.009021000 |
| 6 | 11.122249000 | 7.396974000  | 3.566392000 |
| 1 | 10.186053000 | 7.632316000  | 3.037398000 |



|   |              |             |             |
|---|--------------|-------------|-------------|
| 6 | 11.311890000 | 5.870071000 | 3.494746000 |
| 1 | 12.236624000 | 5.558092000 | 4.008743000 |
| 1 | 11.381514000 | 5.536530000 | 2.445868000 |
| 1 | 10.469172000 | 5.338785000 | 3.966057000 |
| 6 | 12.257486000 | 8.133689000 | 2.833773000 |
| 1 | 13.240620000 | 7.923893000 | 3.286677000 |
| 1 | 12.304043000 | 7.814480000 | 1.779353000 |
| 1 | 12.102274000 | 9.224683000 | 2.851357000 |

$^4[1]^0$

Spin multiplicity : Quartet / Charge : 0

|    |             |              |              |
|----|-------------|--------------|--------------|
| 27 | 8.338709000 | 10.161559000 | 3.273351000  |
| 7  | 7.232125000 | 11.228441000 | 1.674411000  |
| 7  | 7.044814000 | 8.833148000  | 2.671023000  |
| 7  | 8.838246000 | 8.505918000  | 4.572857000  |
| 7  | 9.578533000 | 11.502817000 | 3.890397000  |
| 6  | 7.414174000 | 12.479930000 | 1.230613000  |
| 1  | 8.215077000 | 13.051028000 | 1.711603000  |
| 6  | 6.642722000 | 13.044942000 | 0.217297000  |
| 1  | 6.828767000 | 14.069540000 | -0.111613000 |
| 6  | 5.630615000 | 12.261968000 | -0.356797000 |
| 1  | 4.999794000 | 12.664275000 | -1.153702000 |
| 6  | 5.436325000 | 10.960747000 | 0.100442000  |
| 1  | 4.654212000 | 10.336946000 | -0.334546000 |
| 6  | 6.256737000 | 10.458783000 | 1.126575000  |
| 6  | 6.143000000 | 9.093243000  | 1.689507000  |
| 6  | 5.213432000 | 8.144186000  | 1.272189000  |
| 1  | 4.496312000 | 8.368929000  | 0.481800000  |
| 6  | 5.214350000 | 6.866599000  | 1.896488000  |
| 1  | 4.493909000 | 6.106799000  | 1.583563000  |
| 6  | 6.130952000 | 6.596188000  | 2.899045000  |
| 1  | 6.150994000 | 5.621396000  | 3.395420000  |
| 6  | 7.059536000 | 7.593401000  | 3.294378000  |
| 6  | 8.047148000 | 7.457667000  | 4.300105000  |
| 1  | 8.151680000 | 6.506763000  | 4.840185000  |

|   |              |              |             |
|---|--------------|--------------|-------------|
| 6 | 9.875162000  | 8.381679000  | 5.516973000 |
| 6 | 9.754587000  | 9.045317000  | 6.774368000 |
| 6 | 10.798010000 | 8.939487000  | 7.704216000 |
| 1 | 10.706557000 | 9.434963000  | 8.674306000 |
| 6 | 8.479190000  | 9.812658000  | 7.113958000 |
| 1 | 8.044754000  | 10.126119000 | 6.150955000 |
| 6 | 7.448599000  | 8.894491000  | 7.799617000 |
| 1 | 7.218682000  | 8.014473000  | 7.178254000 |
| 1 | 6.504324000  | 9.433592000  | 7.987946000 |
| 1 | 7.830078000  | 8.531769000  | 8.769740000 |
| 6 | 8.719125000  | 11.080259000 | 7.947830000 |
| 1 | 9.073936000  | 10.848774000 | 8.966020000 |
| 1 | 7.780076000  | 11.648316000 | 8.054422000 |
| 1 | 9.462928000  | 11.741918000 | 7.474418000 |
| 6 | 10.317529000 | 12.312345000 | 4.279460000 |
| 6 | 11.239619000 | 13.325150000 | 4.767552000 |
| 1 | 11.192401000 | 14.220642000 | 4.128309000 |
| 1 | 12.268974000 | 12.933199000 | 4.759793000 |
| 1 | 10.974838000 | 13.606901000 | 5.799094000 |
| 6 | 11.952224000 | 8.203660000  | 7.420902000 |
| 1 | 12.753033000 | 8.126454000  | 8.162070000 |
| 6 | 12.077441000 | 7.577321000  | 6.180439000 |
| 1 | 12.989101000 | 7.015899000  | 5.954467000 |
| 6 | 11.064192000 | 7.658577000  | 5.211448000 |
| 6 | 11.275855000 | 7.000379000  | 3.848706000 |
| 1 | 10.416544000 | 7.273148000  | 3.219679000 |

|   |              |             |             |
|---|--------------|-------------|-------------|
| 6 | 11.306097000 | 5.464303000 | 3.946299000 |
| 1 | 12.146819000 | 5.117876000 | 4.571253000 |
| 1 | 11.424667000 | 5.011663000 | 2.947135000 |
| 1 | 10.375673000 | 5.072417000 | 4.387942000 |
| 6 | 12.536090000 | 7.532788000 | 3.141293000 |
| 1 | 13.456694000 | 7.271082000 | 3.689140000 |
| 1 | 12.620746000 | 7.103096000 | 2.128837000 |
| 1 | 12.503817000 | 8.630220000 | 3.041684000 |

$^4[1-H]^+$

Spin multiplicity : Quartet / Charge : 1+

|    |             |              |              |
|----|-------------|--------------|--------------|
| 27 | 8.194039000 | 10.370662000 | 3.472685000  |
| 7  | 7.505689000 | 11.001048000 | 1.502502000  |
| 7  | 6.822646000 | 8.902949000  | 2.851844000  |
| 7  | 8.685886000 | 8.566055000  | 4.655945000  |
| 7  | 9.962696000 | 11.383299000 | 3.564965000  |
| 6  | 7.945802000 | 12.089722000 | 0.859654000  |
| 1  | 8.838447000 | 12.571525000 | 1.268089000  |
| 6  | 7.312287000 | 12.600561000 | -0.275045000 |
| 1  | 7.710630000 | 13.489092000 | -0.768661000 |
| 6  | 6.171656000 | 11.950854000 | -0.750462000 |
| 1  | 5.644437000 | 12.322072000 | -1.632532000 |
| 6  | 5.711203000 | 10.812311000 | -0.085226000 |
| 1  | 4.824782000 | 10.286375000 | -0.441511000 |
| 6  | 6.404947000 | 10.357547000 | 1.041711000  |
| 6  | 6.037308000 | 9.132369000  | 1.797476000  |
| 6  | 5.014243000 | 8.224595000  | 1.470380000  |
| 1  | 4.358253000 | 8.397071000  | 0.616363000  |
| 6  | 4.860700000 | 7.077573000  | 2.253489000  |
| 1  | 4.071232000 | 6.360773000  | 2.016463000  |
| 6  | 5.733322000 | 6.832560000  | 3.321239000  |
| 1  | 5.656602000 | 5.925728000  | 3.924629000  |
| 6  | 6.725508000 | 7.783552000  | 3.581700000  |
| 6  | 7.778008000 | 7.657301000  | 4.600777000  |
| 1  | 7.774222000 | 6.783535000  | 5.267801000  |

|   |              |              |             |
|---|--------------|--------------|-------------|
| 6 | 9.729351000  | 8.495162000  | 5.630391000 |
| 6 | 9.459272000  | 8.767297000  | 6.994231000 |
| 6 | 10.537719000 | 8.709827000  | 7.893537000 |
| 1 | 10.358469000 | 8.910394000  | 8.952944000 |
| 6 | 8.068442000  | 9.130544000  | 7.513831000 |
| 1 | 7.397925000  | 9.239370000  | 6.649460000 |
| 6 | 7.492361000  | 8.018674000  | 8.410845000 |
| 1 | 7.447315000  | 7.054383000  | 7.879527000 |
| 1 | 6.471219000  | 8.276840000  | 8.736812000 |
| 1 | 8.107982000  | 7.876455000  | 9.314693000 |
| 6 | 8.063392000  | 10.487958000 | 8.240786000 |
| 1 | 8.677916000  | 10.466731000 | 9.155749000 |
| 1 | 7.035903000  | 10.755085000 | 8.538091000 |
| 1 | 8.447876000  | 11.290177000 | 7.590687000 |
| 6 | 10.931359000 | 12.003614000 | 3.688478000 |
| 6 | 12.141612000 | 12.783292000 | 3.863396000 |
| 1 | 12.328061000 | 13.387039000 | 2.961920000 |
| 1 | 12.993500000 | 12.106987000 | 4.033647000 |
| 1 | 12.024470000 | 13.449724000 | 4.732110000 |
| 6 | 11.828237000 | 8.404705000  | 7.465000000 |
| 1 | 12.648922000 | 8.361740000  | 8.186322000 |
| 6 | 12.073873000 | 8.159637000  | 6.111606000 |
| 1 | 13.089278000 | 7.923072000  | 5.786451000 |
| 6 | 11.039484000 | 8.207735000  | 5.168105000 |
| 6 | 11.294563000 | 7.889399000  | 3.696918000 |
| 1 | 10.504513000 | 8.393991000  | 3.116320000 |

|   |              |              |             |
|---|--------------|--------------|-------------|
| 6 | 11.157490000 | 6.376713000  | 3.431130000 |
| 1 | 11.922507000 | 5.812953000  | 3.991105000 |
| 1 | 11.290268000 | 6.157520000  | 2.358678000 |
| 1 | 10.169977000 | 5.995076000  | 3.735707000 |
| 6 | 12.643333000 | 8.411385000  | 3.179492000 |
| 1 | 13.493815000 | 7.873171000  | 3.628799000 |
| 1 | 12.707652000 | 8.268027000  | 2.088780000 |
| 1 | 12.772352000 | 9.485017000  | 3.389965000 |
| 1 | 7.090814000  | 11.077117000 | 4.473490000 |

$^4[1-NH]^+$

Spin multiplicity : Quartet / Charge : 1+

|    |             |              |              |
|----|-------------|--------------|--------------|
| 27 | 8.383416000 | 9.832176000  | 3.450822000  |
| 7  | 7.742425000 | 10.902223000 | 1.720671000  |
| 7  | 7.115343000 | 8.582490000  | 2.735805000  |
| 7  | 8.235735000 | 8.363514000  | 5.183469000  |
| 7  | 9.742511000 | 11.094473000 | 4.215710000  |
| 6  | 8.138655000 | 12.111856000 | 1.296371000  |
| 1  | 8.834780000 | 12.652674000 | 1.944225000  |
| 6  | 7.694746000 | 12.664494000 | 0.097884000  |
| 1  | 8.038846000 | 13.653668000 | -0.210095000 |
| 6  | 6.807284000 | 11.918921000 | -0.687486000 |
| 1  | 6.437271000 | 12.315728000 | -1.635808000 |
| 6  | 6.395632000 | 10.661470000 | -0.249248000 |
| 1  | 5.705688000 | 10.067636000 | -0.849649000 |
| 6  | 6.878820000 | 10.169009000 | 0.972044000  |
| 6  | 6.503319000 | 8.853115000  | 1.545310000  |
| 6  | 5.621154000 | 7.963402000  | 0.964191000  |
| 1  | 5.134047000 | 8.184954000  | 0.014787000  |
| 6  | 5.353682000 | 6.729781000  | 1.638675000  |
| 1  | 4.665939000 | 6.011900000  | 1.184957000  |
| 6  | 5.942864000 | 6.452904000  | 2.843164000  |
| 1  | 5.737826000 | 5.521621000  | 3.376583000  |
| 6  | 6.841983000 | 7.414734000  | 3.440221000  |
| 6  | 7.451503000 | 7.260493000  | 4.665233000  |
| 1  | 7.337199000 | 6.366262000  | 5.280859000  |



|   |              |              |              |
|---|--------------|--------------|--------------|
| 6 | 9.399934000  | 8.005566000  | 5.963434000  |
| 6 | 9.398946000  | 8.237754000  | 7.364756000  |
| 6 | 10.552417000 | 7.904983000  | 8.091089000  |
| 1 | 10.579179000 | 8.081342000  | 9.167972000  |
| 6 | 8.196980000  | 8.859305000  | 8.081608000  |
| 1 | 7.287237000  | 8.585281000  | 7.519611000  |
| 6 | 7.981850000  | 8.317743000  | 9.504403000  |
| 1 | 7.949085000  | 7.216665000  | 9.519295000  |
| 1 | 7.026484000  | 8.692863000  | 9.905103000  |
| 1 | 8.775365000  | 8.644926000  | 10.195600000 |
| 6 | 8.291066000  | 10.398945000 | 8.096437000  |
| 1 | 9.179761000  | 10.725258000 | 8.661997000  |
| 1 | 7.400848000  | 10.838706000 | 8.575686000  |
| 1 | 8.371384000  | 10.816651000 | 7.079968000  |
| 6 | 10.533530000 | 11.819851000 | 4.647852000  |
| 6 | 11.523602000 | 12.729813000 | 5.187835000  |
| 1 | 11.980746000 | 13.305215000 | 4.367976000  |
| 1 | 12.301680000 | 12.157031000 | 5.715763000  |
| 1 | 11.036326000 | 13.420669000 | 5.893580000  |
| 6 | 11.664021000 | 7.337325000  | 7.467815000  |
| 1 | 12.548250000 | 7.075852000  | 8.055191000  |
| 6 | 11.640769000 | 7.102985000  | 6.093821000  |
| 1 | 12.515186000 | 6.658406000  | 5.612052000  |
| 6 | 10.522340000 | 7.435313000  | 5.313670000  |
| 6 | 10.568629000 | 7.176641000  | 3.808023000  |
| 1 | 9.661400000  | 7.608810000  | 3.356710000  |

|   |              |             |             |             |             |
|---|--------------|-------------|-------------|-------------|-------------|
| 6 | 10.545280000 | 5.669485000 | 3.490998000 |             |             |
| 1 | 11.442344000 | 5.168152000 | 3.891118000 |             |             |
| 1 | 10.525855000 | 5.504880000 | 2.400909000 |             |             |
| 1 | 9.659460000  | 5.181819000 | 3.926677000 |             |             |
| 6 | 11.773748000 | 7.860003000 | 3.134609000 |             |             |
| 1 | 12.729739000 | 7.434157000 | 3.480175000 |             |             |
| 1 | 11.726068000 | 7.722568000 | 2.041690000 |             |             |
| 1 | 11.791519000 | 8.942019000 | 3.341137000 |             |             |
| 1 |              | 7.629105000 |             | 8.955403000 | 5.757672000 |

$^3[1-H]^0$

Spin multiplicity : Triplet / Charge : 0

|    |             |              |              |
|----|-------------|--------------|--------------|
| 27 | 8.208602000 | 10.362311000 | 3.753997000  |
| 7  | 7.202408000 | 11.430609000 | 1.896476000  |
| 7  | 7.079862000 | 8.980800000  | 2.797001000  |
| 7  | 8.764509000 | 8.637368000  | 4.790446000  |
| 7  | 9.991584000 | 11.079406000 | 2.983828000  |
| 6  | 7.333422000 | 12.706261000 | 1.519841000  |
| 1  | 8.048896000 | 13.309077000 | 2.089319000  |
| 6  | 6.611059000 | 13.264322000 | 0.464252000  |
| 1  | 6.755295000 | 14.311430000 | 0.189305000  |
| 6  | 5.704321000 | 12.446172000 | -0.220227000 |
| 1  | 5.114345000 | 12.840882000 | -1.051451000 |
| 6  | 5.560727000 | 11.116722000 | 0.172137000  |
| 1  | 4.858135000 | 10.463953000 | -0.347437000 |
| 6  | 6.333747000 | 10.631673000 | 1.242489000  |
| 6  | 6.267723000 | 9.233526000  | 1.740379000  |
| 6  | 5.452537000 | 8.246099000  | 1.195926000  |
| 1  | 4.803010000 | 8.460193000  | 0.346838000  |
| 6  | 5.474483000 | 6.946528000  | 1.763381000  |
| 1  | 4.838457000 | 6.160851000  | 1.348586000  |
| 6  | 6.306514000 | 6.684462000  | 2.837677000  |
| 1  | 6.349464000 | 5.692038000  | 3.294135000  |
| 6  | 7.124401000 | 7.721405000  | 3.350914000  |
| 6  | 8.042905000 | 7.578773000  | 4.430684000  |
| 1  | 8.146290000 | 6.612212000  | 4.939452000  |

|   |              |              |             |
|---|--------------|--------------|-------------|
| 6 | 9.725086000  | 8.493225000  | 5.829064000 |
| 6 | 9.375526000  | 8.827176000  | 7.165068000 |
| 6 | 10.347090000 | 8.686974000  | 8.168280000 |
| 1 | 10.087931000 | 8.928937000  | 9.202497000 |
| 6 | 7.964514000  | 9.291119000  | 7.518411000 |
| 1 | 7.489264000  | 9.591765000  | 6.573401000 |
| 6 | 7.131910000  | 8.141988000  | 8.118301000 |
| 1 | 7.081398000  | 7.280807000  | 7.432715000 |
| 1 | 6.099640000  | 8.473437000  | 8.322870000 |
| 1 | 7.567150000  | 7.789692000  | 9.069375000 |
| 6 | 7.949742000  | 10.521679000 | 8.440008000 |
| 1 | 8.359128000  | 10.298680000 | 9.439308000 |
| 1 | 6.915603000  | 10.877167000 | 8.582238000 |
| 1 | 8.535602000  | 11.350783000 | 8.010854000 |
| 6 | 10.958612000 | 11.574384000 | 2.585287000 |
| 6 | 12.167435000 | 12.206398000 | 2.085316000 |
| 1 | 12.028651000 | 12.490253000 | 1.030779000 |
| 1 | 13.013657000 | 11.507168000 | 2.165780000 |
| 1 | 12.385293000 | 13.108500000 | 2.677907000 |
| 6 | 11.636336000 | 8.240818000  | 7.873046000 |
| 1 | 12.378110000 | 8.135212000  | 8.669928000 |
| 6 | 11.974483000 | 7.934094000  | 6.554028000 |
| 1 | 12.987028000 | 7.589767000  | 6.327547000 |
| 6 | 11.040463000 | 8.056815000  | 5.513340000 |
| 6 | 11.436044000 | 7.701688000  | 4.081024000 |
| 1 | 10.668995000 | 8.136634000  | 3.422692000 |

|   |              |              |             |
|---|--------------|--------------|-------------|
| 6 | 11.427848000 | 6.176805000  | 3.857090000 |
| 1 | 12.171982000 | 5.679424000  | 4.502422000 |
| 1 | 11.674709000 | 5.934414000  | 2.809527000 |
| 1 | 10.442101000 | 5.740847000  | 4.083572000 |
| 6 | 12.789948000 | 8.301904000  | 3.665262000 |
| 1 | 13.630588000 | 7.847889000  | 4.215676000 |
| 1 | 12.970108000 | 8.125733000  | 2.591820000 |
| 1 | 12.821535000 | 9.389103000  | 3.841599000 |
| 1 | 7.579563000  | 11.537583000 | 4.749302000 |

TS-[1--H--NEt<sub>3</sub>]<sup>+</sup>

Spin multiplicity : Quartet / Charge : 1+

|    |             |              |              |
|----|-------------|--------------|--------------|
| 27 | 8.120556000 | 9.814173000  | 3.641155000  |
| 7  | 7.329707000 | 10.446656000 | 1.695849000  |
| 7  | 7.084190000 | 8.233428000  | 3.003932000  |
| 7  | 8.920704000 | 8.257898000  | 4.827468000  |
| 7  | 9.431543000 | 11.305797000 | 3.979206000  |
| 6  | 7.540253000 | 11.623539000 | 1.086432000  |
| 1  | 8.304262000 | 12.269944000 | 1.528328000  |
| 6  | 6.834787000 | 12.021307000 | -0.047552000 |
| 1  | 7.043956000 | 12.987050000 | -0.511863000 |
| 6  | 5.862355000 | 11.155642000 | -0.563906000 |
| 1  | 5.283898000 | 11.432130000 | -1.448858000 |
| 6  | 5.639898000 | 9.931702000  | 0.064395000  |
| 1  | 4.887044000 | 9.242448000  | -0.320440000 |
| 6  | 6.395769000 | 9.594881000  | 1.197190000  |
| 6  | 6.268568000 | 8.314446000  | 1.929353000  |
| 6  | 5.450077000 | 7.244836000  | 1.574436000  |
| 1  | 4.798706000 | 7.300580000  | 0.701115000  |
| 6  | 5.496351000 | 6.064127000  | 2.352906000  |
| 1  | 4.854783000 | 5.219009000  | 2.093502000  |
| 6  | 6.382188000 | 5.971427000  | 3.420126000  |
| 1  | 6.464103000 | 5.055718000  | 4.011000000  |
| 6  | 7.204549000 | 7.078102000  | 3.721465000  |
| 6  | 8.235657000 | 7.131876000  | 4.714144000  |
| 1  | 8.450760000 | 6.256003000  | 5.338592000  |

|   |              |              |             |
|---|--------------|--------------|-------------|
| 6 | 10.011413000 | 8.333846000  | 5.740398000 |
| 6 | 9.791350000  | 8.477454000  | 7.134683000 |
| 6 | 10.909888000 | 8.557259000  | 7.981297000 |
| 1 | 10.757905000 | 8.659867000  | 9.059187000 |
| 6 | 8.389278000  | 8.552194000  | 7.733796000 |
| 1 | 7.679241000  | 8.632401000  | 6.898222000 |
| 6 | 8.037507000  | 7.276099000  | 8.521332000 |
| 1 | 8.119107000  | 6.376754000  | 7.890093000 |
| 1 | 7.005388000  | 7.329352000  | 8.906397000 |
| 1 | 8.711813000  | 7.143375000  | 9.384207000 |
| 6 | 8.196089000  | 9.807143000  | 8.603861000 |
| 1 | 8.835129000  | 9.789123000  | 9.502081000 |
| 1 | 7.150174000  | 9.877012000  | 8.945477000 |
| 1 | 8.430910000  | 10.724320000 | 8.039863000 |
| 6 | 10.190554000 | 12.150080000 | 4.205003000 |
| 6 | 11.141183000 | 13.207578000 | 4.492457000 |
| 1 | 12.092542000 | 12.767185000 | 4.828645000 |
| 1 | 10.741040000 | 13.858758000 | 5.285188000 |
| 1 | 11.316028000 | 13.805222000 | 3.584526000 |
| 6 | 12.208616000 | 8.510921000  | 7.476761000 |
| 1 | 13.064562000 | 8.572894000  | 8.154701000 |
| 6 | 12.411620000 | 8.390126000  | 6.100012000 |
| 1 | 13.432242000 | 8.355979000  | 5.711541000 |
| 6 | 11.331124000 | 8.304021000  | 5.210983000 |
| 6 | 11.569135000 | 8.120198000  | 3.713638000 |
| 1 | 10.660602000 | 8.474245000  | 3.200703000 |

|   |              |              |             |
|---|--------------|--------------|-------------|
| 6 | 11.732711000 | 6.627953000  | 3.362095000 |
| 1 | 12.627031000 | 6.206129000  | 3.851570000 |
| 1 | 11.847351000 | 6.494411000  | 2.273259000 |
| 1 | 10.861570000 | 6.037212000  | 3.687151000 |
| 6 | 12.749130000 | 8.940716000  | 3.170790000 |
| 1 | 13.716855000 | 8.582159000  | 3.558303000 |
| 1 | 12.789791000 | 8.860544000  | 2.072129000 |
| 1 | 12.654939000 | 10.007722000 | 3.430160000 |
| 7 | 5.195107000  | 10.716558000 | 5.039796000 |
| 6 | 4.469095000  | 11.203973000 | 3.853509000 |
| 6 | 3.186818000  | 12.012985000 | 4.087220000 |
| 1 | 4.242436000  | 10.320949000 | 3.237060000 |
| 1 | 5.170050000  | 11.816522000 | 3.264384000 |
| 1 | 2.779632000  | 12.321713000 | 3.110484000 |
| 1 | 2.409259000  | 11.434565000 | 4.606136000 |
| 1 | 3.374289000  | 12.929473000 | 4.668112000 |
| 6 | 4.733829000  | 9.435824000  | 5.603328000 |
| 6 | 3.398428000  | 9.420918000  | 6.356626000 |
| 1 | 5.528757000  | 9.091011000  | 6.284333000 |
| 1 | 4.697175000  | 8.712629000  | 4.773566000 |
| 1 | 3.254172000  | 8.424280000  | 6.805145000 |
| 1 | 3.374506000  | 10.157780000 | 7.175036000 |
| 1 | 2.540611000  | 9.611704000  | 5.694718000 |
| 6 | 5.535452000  | 11.727387000 | 6.051979000 |
| 6 | 6.307353000  | 12.924387000 | 5.504410000 |
| 1 | 6.147742000  | 11.217280000 | 6.812597000 |



|   |             |              |             |
|---|-------------|--------------|-------------|
| 1 | 4.625743000 | 12.082315000 | 6.574184000 |
| 1 | 6.629577000 | 13.564004000 | 6.341134000 |
| 1 | 7.203441000 | 12.595502000 | 4.957820000 |
| 1 | 5.700588000 | 13.546469000 | 4.828671000 |
| 1 | 6.723352000 | 10.188949000 | 4.366243000 |

IRC backward-[1--H--NEt<sub>3</sub>]<sup>+</sup>

Spin multiplicity : Quartet / Charge : 1+

|    |             |              |              |
|----|-------------|--------------|--------------|
| 27 | 8.438410000 | 9.846549000  | 3.396928000  |
| 7  | 7.333149000 | 10.634153000 | 1.626587000  |
| 7  | 7.150263000 | 8.432842000  | 2.997624000  |
| 7  | 9.033822000 | 8.363243000  | 4.840826000  |
| 7  | 9.717265000 | 11.280365000 | 3.667495000  |
| 6  | 7.500890000 | 11.807780000 | 0.998554000  |
| 1  | 8.263801000 | 12.473640000 | 1.414751000  |
| 6  | 6.760485000 | 12.180582000 | -0.120728000 |
| 1  | 6.933851000 | 13.146278000 | -0.600094000 |
| 6  | 5.797231000 | 11.283308000 | -0.605300000 |
| 1  | 5.192982000 | 11.534485000 | -1.480793000 |
| 6  | 5.616204000 | 10.064698000 | 0.043234000  |
| 1  | 4.868996000 | 9.356679000  | -0.317575000 |
| 6  | 6.404842000 | 9.755651000  | 1.166041000  |
| 6  | 6.306231000 | 8.490857000  | 1.927614000  |
| 6  | 5.454172000 | 7.439401000  | 1.609729000  |
| 1  | 4.786370000 | 7.498309000  | 0.749172000  |
| 6  | 5.475679000 | 6.267681000  | 2.415812000  |
| 1  | 4.808167000 | 5.434561000  | 2.183372000  |
| 6  | 6.366092000 | 6.184049000  | 3.474102000  |
| 1  | 6.425062000 | 5.282083000  | 4.090172000  |
| 6  | 7.231542000 | 7.270357000  | 3.753734000  |
| 6  | 8.246426000 | 7.285740000  | 4.741889000  |
| 1  | 8.391954000 | 6.408805000  | 5.386595000  |

|   |              |              |             |
|---|--------------|--------------|-------------|
| 6 | 10.080145000 | 8.388571000  | 5.788142000 |
| 6 | 9.818128000  | 8.534914000  | 7.179987000 |
| 6 | 10.901625000 | 8.572947000  | 8.073127000 |
| 1 | 10.707203000 | 8.677455000  | 9.144441000 |
| 6 | 8.396673000  | 8.664819000  | 7.724580000 |
| 1 | 7.727171000  | 8.774754000  | 6.858850000 |
| 6 | 7.957664000  | 7.402279000  | 8.490254000 |
| 1 | 8.025334000  | 6.502972000  | 7.857499000 |
| 1 | 6.914047000  | 7.497631000  | 8.835176000 |
| 1 | 8.590206000  | 7.236075000  | 9.378829000 |
| 6 | 8.217885000  | 9.921400000  | 8.596046000 |
| 1 | 8.824243000  | 9.875655000  | 9.515731000 |
| 1 | 7.164634000  | 10.027887000 | 8.905539000 |
| 1 | 8.505195000  | 10.833285000 | 8.047758000 |
| 6 | 10.500220000 | 12.127279000 | 3.809155000 |
| 6 | 11.489555000 | 13.178363000 | 3.979065000 |
| 1 | 12.499322000 | 12.738875000 | 4.003032000 |
| 1 | 11.311412000 | 13.714643000 | 4.924428000 |
| 1 | 11.427608000 | 13.893080000 | 3.143569000 |
| 6 | 12.219491000 | 8.487019000  | 7.625026000 |
| 1 | 13.048378000 | 8.518292000  | 8.338057000 |
| 6 | 12.472236000 | 8.366443000  | 6.255921000 |
| 1 | 13.506752000 | 8.301064000  | 5.909563000 |
| 6 | 11.427204000 | 8.316090000  | 5.323255000 |
| 6 | 11.718478000 | 8.126815000  | 3.836345000 |
| 1 | 10.860245000 | 8.557538000  | 3.295297000 |

|   |              |              |             |
|---|--------------|--------------|-------------|
| 6 | 11.778077000 | 6.630242000  | 3.470785000 |
| 1 | 12.615735000 | 6.132549000  | 3.989192000 |
| 1 | 11.926386000 | 6.497851000  | 2.385449000 |
| 1 | 10.850145000 | 6.108112000  | 3.752798000 |
| 6 | 12.981262000 | 8.853946000  | 3.350933000 |
| 1 | 13.901856000 | 8.417443000  | 3.772713000 |
| 1 | 13.061794000 | 8.779806000  | 2.253783000 |
| 1 | 12.962515000 | 9.923377000  | 3.617600000 |
| 7 | 5.089613000  | 10.471570000 | 4.946413000 |
| 6 | 4.260115000  | 11.114374000 | 3.844800000 |
| 6 | 3.090703000  | 11.979770000 | 4.288765000 |
| 1 | 3.922935000  | 10.283146000 | 3.210768000 |
| 1 | 4.969543000  | 11.708919000 | 3.253714000 |
| 1 | 2.592254000  | 12.344666000 | 3.377209000 |
| 1 | 2.344831000  | 11.429933000 | 4.877011000 |
| 1 | 3.411509000  | 12.862597000 | 4.860440000 |
| 6 | 4.551313000  | 9.147315000  | 5.461051000 |
| 6 | 3.283651000  | 9.202318000  | 6.297589000 |
| 1 | 5.378575000  | 8.714704000  | 6.041046000 |
| 1 | 4.411026000  | 8.521970000  | 4.568597000 |
| 1 | 3.091285000  | 8.183338000  | 6.667750000 |
| 1 | 3.383683000  | 9.857441000  | 7.175481000 |
| 1 | 2.403892000  | 9.511902000  | 5.716980000 |
| 6 | 5.494176000  | 11.409764000 | 6.058861000 |
| 6 | 6.353487000  | 12.568899000 | 5.578144000 |
| 1 | 6.049644000  | 10.792336000 | 6.777691000 |

|   |             |              |             |
|---|-------------|--------------|-------------|
| 1 | 4.578349000 | 11.757853000 | 6.552450000 |
| 1 | 6.707320000 | 13.127754000 | 6.457554000 |
| 1 | 7.236872000 | 12.205127000 | 5.029253000 |
| 1 | 5.803187000 | 13.269845000 | 4.933498000 |
| 1 | 5.975251000 | 10.196125000 | 4.475508000 |

IRC forward-[1--H--NEt<sub>3</sub>]<sup>+</sup>

Spin multiplicity : Quartet / Charge : 1+

|    |              |              |              |
|----|--------------|--------------|--------------|
| 27 | 8.594886000  | 9.970000000  | 3.511594000  |
| 7  | 7.819834000  | 10.599522000 | 1.563836000  |
| 7  | 7.432120000  | 8.368320000  | 2.823118000  |
| 7  | 9.304555000  | 8.200487000  | 4.643457000  |
| 7  | 10.275980000 | 11.143156000 | 3.573639000  |
| 6  | 8.095588000  | 11.770568000 | 0.977462000  |
| 1  | 8.918088000  | 12.350607000 | 1.405048000  |
| 6  | 7.381280000  | 12.246234000 | -0.124504000 |
| 1  | 7.645741000  | 13.206092000 | -0.572354000 |
| 6  | 6.335035000  | 11.469691000 | -0.625790000 |
| 1  | 5.748305000  | 11.809456000 | -1.482604000 |
| 6  | 6.045804000  | 10.245715000 | -0.018415000 |
| 1  | 5.233481000  | 9.622079000  | -0.393745000 |
| 6  | 6.812683000  | 9.833602000  | 1.076968000  |
| 6  | 6.621134000  | 8.536473000  | 1.776005000  |
| 6  | 5.725528000  | 7.518421000  | 1.403910000  |
| 1  | 5.054592000  | 7.642986000  | 0.553163000  |
| 6  | 5.719861000  | 6.328859000  | 2.136871000  |
| 1  | 5.030842000  | 5.526139000  | 1.864818000  |
| 6  | 6.613247000  | 6.157980000  | 3.201993000  |
| 1  | 6.652780000  | 5.226771000  | 3.770922000  |
| 6  | 7.472694000  | 7.217654000  | 3.508478000  |
| 6  | 8.522723000  | 7.185477000  | 4.538253000  |
| 1  | 8.623235000  | 6.292861000  | 5.171933000  |

|   |              |              |             |
|---|--------------|--------------|-------------|
| 6 | 10.344072000 | 8.215558000  | 5.626911000 |
| 6 | 10.037183000 | 8.477201000  | 6.984022000 |
| 6 | 11.104229000 | 8.505557000  | 7.897804000 |
| 1 | 10.896239000 | 8.698771000  | 8.953295000 |
| 6 | 8.612790000  | 8.729354000  | 7.476800000 |
| 1 | 7.958698000  | 8.811402000  | 6.596746000 |
| 6 | 8.096753000  | 7.557100000  | 8.332496000 |
| 1 | 8.126361000  | 6.606660000  | 7.775672000 |
| 1 | 7.054694000  | 7.737232000  | 8.644469000 |
| 1 | 8.704479000  | 7.432219000  | 9.244296000 |
| 6 | 8.490444000  | 10.064343000 | 8.233511000 |
| 1 | 9.074112000  | 10.063857000 | 9.168660000 |
| 1 | 7.437484000  | 10.252281000 | 8.500962000 |
| 1 | 8.838812000  | 10.907062000 | 7.615083000 |
| 6 | 11.203051000 | 11.832902000 | 3.628884000 |
| 6 | 12.363251000 | 12.700461000 | 3.698885000 |
| 1 | 13.271189000 | 12.090468000 | 3.824219000 |
| 1 | 12.260183000 | 13.383846000 | 4.556020000 |
| 1 | 12.441765000 | 13.286780000 | 2.770382000 |
| 6 | 12.419421000 | 8.293698000  | 7.487181000 |
| 1 | 13.231966000 | 8.317038000  | 8.218545000 |
| 6 | 12.699338000 | 8.056419000  | 6.139197000 |
| 1 | 13.733562000 | 7.893396000  | 5.828209000 |
| 6 | 11.676323000 | 8.020311000  | 5.182160000 |
| 6 | 11.975023000 | 7.714274000  | 3.716150000 |
| 1 | 11.150121000 | 8.141810000  | 3.122605000 |

|   |              |              |             |
|---|--------------|--------------|-------------|
| 6 | 11.978407000 | 6.193438000  | 3.460946000 |
| 1 | 12.781367000 | 5.703521000  | 4.036903000 |
| 1 | 12.146552000 | 5.979595000  | 2.392398000 |
| 1 | 11.024388000 | 5.727357000  | 3.754310000 |
| 6 | 13.276702000 | 8.353049000  | 3.209182000 |
| 1 | 14.167288000 | 7.901567000  | 3.675818000 |
| 1 | 13.368637000 | 8.204480000  | 2.121109000 |
| 1 | 13.301891000 | 9.436318000  | 3.408266000 |
| 7 | 4.067700000  | 10.978749000 | 5.500604000 |
| 6 | 3.203460000  | 11.209226000 | 4.345833000 |
| 6 | 1.753866000  | 11.658991000 | 4.602185000 |
| 1 | 3.192021000  | 10.276598000 | 3.756153000 |
| 1 | 3.681579000  | 11.964991000 | 3.696552000 |
| 1 | 1.241878000  | 11.829718000 | 3.640087000 |
| 1 | 1.175250000  | 10.908010000 | 5.161501000 |
| 1 | 1.713522000  | 12.605035000 | 5.166785000 |
| 6 | 4.000003000  | 9.665344000  | 6.130874000 |
| 6 | 2.801426000  | 9.349782000  | 7.043842000 |
| 1 | 4.923861000  | 9.538681000  | 6.725761000 |
| 1 | 4.047169000  | 8.906595000  | 5.329540000 |
| 1 | 2.936863000  | 8.358567000  | 7.509163000 |
| 1 | 2.704669000  | 10.086659000 | 7.858498000 |
| 1 | 1.850056000  | 9.329399000  | 6.489658000 |
| 6 | 4.253487000  | 12.096977000 | 6.417690000 |
| 6 | 4.864694000  | 13.335907000 | 5.760465000 |
| 1 | 4.934293000  | 11.749982000 | 7.214319000 |



|   |             |              |             |
|---|-------------|--------------|-------------|
| 1 | 3.314633000 | 12.395445000 | 6.936111000 |
| 1 | 5.078754000 | 14.102035000 | 6.523278000 |
| 1 | 5.808247000 | 13.079901000 | 5.250203000 |
| 1 | 4.189437000 | 13.791969000 | 5.018839000 |
| 1 | 7.407445000 | 10.502916000 | 4.497229000 |

TS-[1--HH--NEt<sub>3</sub>]<sup>+</sup>

Spin multiplicity : Triplet / Charge : 1+

|    |              |              |              |
|----|--------------|--------------|--------------|
| 27 | 8.682076000  | 10.656643000 | 3.958735000  |
| 7  | 7.697194000  | 11.911822000 | 2.320435000  |
| 7  | 7.117054000  | 9.587699000  | 3.329860000  |
| 7  | 9.002722000  | 8.903859000  | 5.006512000  |
| 7  | 10.527539000 | 11.124780000 | 3.187977000  |
| 6  | 8.097416000  | 13.099401000 | 1.853110000  |
| 1  | 9.020089000  | 13.505043000 | 2.279916000  |
| 6  | 7.393499000  | 13.803822000 | 0.875477000  |
| 1  | 7.760613000  | 14.769713000 | 0.522546000  |
| 6  | 6.217239000  | 13.238938000 | 0.371306000  |
| 1  | 5.633401000  | 13.756622000 | -0.393924000 |
| 6  | 5.795298000  | 12.001521000 | 0.856137000  |
| 1  | 4.882227000  | 11.544020000 | 0.473553000  |
| 6  | 6.563183000  | 11.354257000 | 1.837554000  |
| 6  | 6.220794000  | 10.029404000 | 2.414348000  |
| 6  | 5.108455000  | 9.266189000  | 2.072957000  |
| 1  | 4.386561000  | 9.621899000  | 1.337049000  |
| 6  | 4.925311000  | 8.007097000  | 2.693609000  |
| 1  | 4.056058000  | 7.397248000  | 2.437022000  |
| 6  | 5.855354000  | 7.550677000  | 3.615385000  |
| 1  | 5.745535000  | 6.577363000  | 4.099929000  |
| 6  | 6.969139000  | 8.363625000  | 3.925602000  |
| 6  | 8.030964000  | 8.020123000  | 4.821013000  |
| 1  | 8.043426000  | 7.040175000  | 5.312428000  |

|   |              |              |             |
|---|--------------|--------------|-------------|
| 6 | 10.137348000 | 8.521370000  | 5.783412000 |
| 6 | 10.246231000 | 8.961898000  | 7.128370000 |
| 6 | 11.377863000 | 8.584263000  | 7.866638000 |
| 1 | 11.472309000 | 8.904347000  | 8.907076000 |
| 6 | 9.133055000  | 9.780200000  | 7.776165000 |
| 1 | 8.577364000  | 10.258153000 | 6.955680000 |
| 6 | 8.142893000  | 8.869766000  | 8.528889000 |
| 1 | 7.712929000  | 8.103893000  | 7.864084000 |
| 1 | 7.311377000  | 9.461412000  | 8.947534000 |
| 1 | 8.642728000  | 8.348991000  | 9.363399000 |
| 6 | 9.651696000  | 10.898968000 | 8.692808000 |
| 1 | 10.154383000 | 10.501740000 | 9.589827000 |
| 1 | 8.811768000  | 11.521544000 | 9.041758000 |
| 1 | 10.364754000 | 11.554703000 | 8.167233000 |
| 6 | 11.569381000 | 11.458487000 | 2.811944000 |
| 6 | 12.874598000 | 11.882106000 | 2.339513000 |
| 1 | 12.754045000 | 12.592158000 | 1.506887000 |
| 1 | 13.446068000 | 11.006456000 | 1.995195000 |
| 1 | 13.420618000 | 12.372382000 | 3.160405000 |
| 6 | 12.384231000 | 7.800228000  | 7.299822000 |
| 1 | 13.256806000 | 7.512935000  | 7.893276000 |
| 6 | 12.273564000 | 7.388629000  | 5.971560000 |
| 1 | 13.068157000 | 6.779181000  | 5.533154000 |
| 6 | 11.163446000 | 7.740228000  | 5.186909000 |
| 6 | 11.078285000 | 7.266358000  | 3.736050000 |
| 1 | 10.284859000 | 7.852301000  | 3.248621000 |

|   |              |              |             |
|---|--------------|--------------|-------------|
| 6 | 10.678546000 | 5.780208000  | 3.652334000 |
| 1 | 11.439836000 | 5.140720000  | 4.130629000 |
| 1 | 10.583700000 | 5.461675000  | 2.600608000 |
| 1 | 9.716732000  | 5.588192000  | 4.153293000 |
| 6 | 12.374862000 | 7.520099000  | 2.947099000 |
| 1 | 13.211100000 | 6.905077000  | 3.317978000 |
| 1 | 12.227705000 | 7.264661000  | 1.884733000 |
| 1 | 12.683421000 | 8.576237000  | 3.002734000 |
| 1 | 8.373456000  | 12.015837000 | 5.067674000 |
| 7 | 6.319371000  | 12.923202000 | 5.934449000 |
| 6 | 5.766310000  | 13.770765000 | 4.854087000 |
| 6 | 4.665911000  | 14.770717000 | 5.220501000 |
| 1 | 5.402783000  | 13.085309000 | 4.073637000 |
| 1 | 6.611591000  | 14.321018000 | 4.409320000 |
| 1 | 4.394075000  | 15.341685000 | 4.317881000 |
| 1 | 3.753952000  | 14.282215000 | 5.592372000 |
| 1 | 4.998943000  | 15.496235000 | 5.978787000 |
| 6 | 5.557822000  | 11.694803000 | 6.250339000 |
| 6 | 4.245868000  | 11.834715000 | 7.026796000 |
| 1 | 6.244604000  | 11.048184000 | 6.822587000 |
| 1 | 5.371302000  | 11.181319000 | 5.293719000 |
| 1 | 3.862920000  | 10.828055000 | 7.260229000 |
| 1 | 4.383648000  | 12.364751000 | 7.982159000 |
| 1 | 3.469846000  | 12.357933000 | 6.449114000 |
| 6 | 6.792731000  | 13.645638000 | 7.133905000 |
| 6 | 7.836643000  | 14.720604000 | 6.838944000 |

|   |             |              |             |
|---|-------------|--------------|-------------|
| 1 | 7.231164000 | 12.885387000 | 7.800545000 |
| 1 | 5.943492000 | 14.089666000 | 7.683907000 |
| 1 | 8.216724000 | 15.124217000 | 7.790487000 |
| 1 | 8.691818000 | 14.312144000 | 6.278483000 |
| 1 | 7.422108000 | 15.564112000 | 6.265946000 |
| 1 | 7.570915000 | 12.321820000 | 5.340078000 |

IRC backward-[1--HH--NEt<sub>3</sub>]<sup>+</sup>

Spin multiplicity : Triplet / Charge : 1+

|    |              |              |              |
|----|--------------|--------------|--------------|
| 27 | 8.739296000  | 10.739903000 | 4.033860000  |
| 7  | 7.778772000  | 12.010694000 | 2.294028000  |
| 7  | 7.200135000  | 9.668489000  | 3.286801000  |
| 7  | 9.059686000  | 8.920966000  | 4.993962000  |
| 7  | 10.545151000 | 11.082769000 | 3.095626000  |
| 6  | 8.169849000  | 13.208261000 | 1.846816000  |
| 1  | 9.081671000  | 13.619381000 | 2.292817000  |
| 6  | 7.473131000  | 13.916414000 | 0.866648000  |
| 1  | 7.834082000  | 14.890030000 | 0.528314000  |
| 6  | 6.310491000  | 13.342563000 | 0.339010000  |
| 1  | 5.731573000  | 13.861471000 | -0.429256000 |
| 6  | 5.896573000  | 12.095988000 | 0.805296000  |
| 1  | 4.993539000  | 11.633552000 | 0.405162000  |
| 6  | 6.660501000  | 11.446117000 | 1.790825000  |
| 6  | 6.324735000  | 10.111191000 | 2.349779000  |
| 6  | 5.226390000  | 9.347837000  | 1.966581000  |
| 1  | 4.526409000  | 9.708855000  | 1.212454000  |
| 6  | 5.026960000  | 8.080091000  | 2.568962000  |
| 1  | 4.167994000  | 7.470010000  | 2.279731000  |
| 6  | 5.930438000  | 7.619786000  | 3.511624000  |
| 1  | 5.810209000  | 6.641015000  | 3.983184000  |
| 6  | 7.037835000  | 8.430048000  | 3.861696000  |
| 6  | 8.068667000  | 8.060631000  | 4.775016000  |
| 1  | 8.043722000  | 7.078109000  | 5.261902000  |

|   |              |              |             |
|---|--------------|--------------|-------------|
| 6 | 10.161212000 | 8.503924000  | 5.794497000 |
| 6 | 10.253824000 | 8.935012000  | 7.145137000 |
| 6 | 11.353641000 | 8.519108000  | 7.910582000 |
| 1 | 11.430240000 | 8.832712000  | 8.954765000 |
| 6 | 9.152249000  | 9.783491000  | 7.773282000 |
| 1 | 8.613004000  | 10.258087000 | 6.940489000 |
| 6 | 8.145243000  | 8.902033000  | 8.537476000 |
| 1 | 7.704390000  | 8.134213000  | 7.881858000 |
| 1 | 7.322396000  | 9.512921000  | 8.946198000 |
| 1 | 8.632800000  | 8.384353000  | 9.381313000 |
| 6 | 9.686434000  | 10.910975000 | 8.670206000 |
| 1 | 10.179287000 | 10.524684000 | 9.577624000 |
| 1 | 8.855968000  | 11.555924000 | 9.002040000 |
| 1 | 10.412578000 | 11.543130000 | 8.133571000 |
| 6 | 11.572393000 | 11.328773000 | 2.623271000 |
| 6 | 12.859440000 | 11.643364000 | 2.027642000 |
| 1 | 12.721694000 | 12.362698000 | 1.205758000 |
| 1 | 13.321682000 | 10.724590000 | 1.635138000 |
| 1 | 13.521121000 | 12.084337000 | 2.789157000 |
| 6 | 12.348474000 | 7.704080000  | 7.367808000 |
| 1 | 13.195826000 | 7.386409000  | 7.982094000 |
| 6 | 12.257143000 | 7.300675000  | 6.035412000 |
| 1 | 13.042519000 | 6.667261000  | 5.614344000 |
| 6 | 11.179123000 | 7.690593000  | 5.224516000 |
| 6 | 11.119214000 | 7.225973000  | 3.769539000 |
| 1 | 10.355097000 | 7.836936000  | 3.266357000 |

|   |              |              |             |
|---|--------------|--------------|-------------|
| 6 | 10.682037000 | 5.751841000  | 3.664597000 |
| 1 | 11.411222000 | 5.088919000  | 4.160875000 |
| 1 | 10.609982000 | 5.441320000  | 2.608556000 |
| 1 | 9.700828000  | 5.583541000  | 4.135449000 |
| 6 | 12.443748000 | 7.447717000  | 3.018041000 |
| 1 | 13.250061000 | 6.802124000  | 3.403313000 |
| 1 | 12.318307000 | 7.209873000  | 1.948757000 |
| 1 | 12.784037000 | 8.492567000  | 3.096456000 |
| 1 | 8.444080000  | 12.015969000 | 5.075509000 |
| 7 | 6.266110000  | 12.926297000 | 6.040977000 |
| 6 | 5.573408000  | 13.664609000 | 4.917295000 |
| 6 | 4.499574000  | 14.668384000 | 5.315648000 |
| 1 | 5.159152000  | 12.885875000 | 4.261813000 |
| 1 | 6.370959000  | 14.168606000 | 4.353206000 |
| 1 | 4.074275000  | 15.084120000 | 4.388802000 |
| 1 | 3.676742000  | 14.216236000 | 5.885133000 |
| 1 | 4.903601000  | 15.510661000 | 5.895874000 |
| 6 | 5.580190000  | 11.654838000 | 6.479444000 |
| 6 | 4.218302000  | 11.797965000 | 7.141351000 |
| 1 | 6.290986000  | 11.165858000 | 7.161093000 |
| 1 | 5.514365000  | 11.031177000 | 5.575973000 |
| 1 | 3.910080000  | 10.801155000 | 7.493240000 |
| 1 | 4.241887000  | 12.464231000 | 8.016946000 |
| 1 | 3.446721000  | 12.153084000 | 6.443587000 |
| 6 | 6.698625000  | 13.787543000 | 7.195094000 |
| 6 | 7.677305000  | 14.882454000 | 6.793057000 |



|   |             |              |             |
|---|-------------|--------------|-------------|
| 1 | 7.169853000 | 13.103183000 | 7.915134000 |
| 1 | 5.800553000 | 14.202826000 | 7.671549000 |
| 1 | 8.020066000 | 15.395537000 | 7.704533000 |
| 1 | 8.560028000 | 14.462950000 | 6.286311000 |
| 1 | 7.222863000 | 15.638776000 | 6.136368000 |
| 1 | 7.172667000 | 12.557225000 | 5.600046000 |

IRC forward-[1--HH--NEt<sub>3</sub>]<sup>+</sup>

Spin multiplicity : Triplet / Charge : 1+

|    |              |              |              |
|----|--------------|--------------|--------------|
| 27 | 9.051616000  | 10.672114000 | 3.639530000  |
| 7  | 8.077795000  | 11.995577000 | 2.157415000  |
| 7  | 7.258370000  | 9.783153000  | 3.281847000  |
| 7  | 9.144303000  | 8.862334000  | 4.861362000  |
| 7  | 10.948187000 | 11.061252000 | 3.252248000  |
| 6  | 8.570773000  | 13.130424000 | 1.651294000  |
| 1  | 9.575100000  | 13.414143000 | 1.980932000  |
| 6  | 7.861429000  | 13.928092000 | 0.749585000  |
| 1  | 8.305990000  | 14.848042000 | 0.364319000  |
| 6  | 6.584703000  | 13.515650000 | 0.362182000  |
| 1  | 5.995248000  | 14.108702000 | -0.341298000 |
| 6  | 6.065212000  | 12.330821000 | 0.888152000  |
| 1  | 5.069149000  | 11.993350000 | 0.599348000  |
| 6  | 6.840601000  | 11.589213000 | 1.789525000  |
| 6  | 6.383648000  | 10.316132000 | 2.411995000  |
| 6  | 5.159976000  | 9.679835000  | 2.149976000  |
| 1  | 4.445730000  | 10.107665000 | 1.445546000  |
| 6  | 4.864970000  | 8.479163000  | 2.804355000  |
| 1  | 3.916477000  | 7.972160000  | 2.613459000  |
| 6  | 5.792102000  | 7.930443000  | 3.695038000  |
| 1  | 5.597591000  | 6.989554000  | 4.214669000  |
| 6  | 6.992979000  | 8.617902000  | 3.905560000  |
| 6  | 8.071878000  | 8.152287000  | 4.784259000  |
| 1  | 7.938286000  | 7.213581000  | 5.340680000  |

|   |              |              |             |
|---|--------------|--------------|-------------|
| 6 | 10.229639000 | 8.431011000  | 5.682670000 |
| 6 | 10.296944000 | 8.860580000  | 7.029428000 |
| 6 | 11.389434000 | 8.434777000  | 7.801415000 |
| 1 | 11.456545000 | 8.741531000  | 8.848468000 |
| 6 | 9.216158000  | 9.750210000  | 7.639170000 |
| 1 | 8.600004000  | 10.126087000 | 6.809818000 |
| 6 | 8.293222000  | 8.952676000  | 8.579028000 |
| 1 | 7.818979000  | 8.106178000  | 8.056464000 |
| 1 | 7.492864000  | 9.598712000  | 8.976858000 |
| 1 | 8.856831000  | 8.546526000  | 9.435810000 |
| 6 | 9.801930000  | 10.982126000 | 8.350539000 |
| 1 | 10.388192000 | 10.705518000 | 9.242219000 |
| 1 | 8.989927000  | 11.648991000 | 8.684524000 |
| 1 | 10.458487000 | 11.557490000 | 7.677773000 |
| 6 | 12.046500000 | 11.284851000 | 2.953276000 |
| 6 | 13.422152000 | 11.573183000 | 2.584666000 |
| 1 | 13.448182000 | 12.136425000 | 1.638918000 |
| 1 | 13.981631000 | 10.632868000 | 2.461675000 |
| 1 | 13.899217000 | 12.173677000 | 3.374984000 |
| 6 | 12.390826000 | 7.629243000  | 7.258072000 |
| 1 | 13.231595000 | 7.306035000  | 7.878066000 |
| 6 | 12.322575000 | 7.245805000  | 5.916785000 |
| 1 | 13.117833000 | 6.625415000  | 5.496711000 |
| 6 | 11.252969000 | 7.641485000  | 5.100326000 |
| 6 | 11.174512000 | 7.210352000  | 3.636957000 |
| 1 | 10.515005000 | 7.932788000  | 3.129360000 |

|   |              |              |             |
|---|--------------|--------------|-------------|
| 6 | 10.532446000 | 5.815754000  | 3.498126000 |
| 1 | 11.150414000 | 5.051685000  | 3.999301000 |
| 1 | 10.439010000 | 5.534210000  | 2.436002000 |
| 1 | 9.528341000  | 5.780069000  | 3.948702000 |
| 6 | 12.530856000 | 7.253312000  | 2.915511000 |
| 1 | 13.224337000 | 6.483668000  | 3.292156000 |
| 1 | 12.390136000 | 7.064661000  | 1.838718000 |
| 1 | 13.020541000 | 8.233807000  | 3.027893000 |
| 1 | 9.093719000  | 11.859044000 | 5.004952000 |
| 7 | 5.777589000  | 12.900196000 | 6.042795000 |
| 6 | 4.921486000  | 13.471037000 | 5.003237000 |
| 6 | 3.741926000  | 14.359382000 | 5.436793000 |
| 1 | 4.537923000  | 12.629707000 | 4.401531000 |
| 1 | 5.556185000  | 14.060640000 | 4.318133000 |
| 1 | 3.224349000  | 14.749265000 | 4.544115000 |
| 1 | 3.002051000  | 13.810321000 | 6.038929000 |
| 1 | 4.079280000  | 15.228261000 | 6.025433000 |
| 6 | 5.311163000  | 11.670594000 | 6.680598000 |
| 6 | 4.236281000  | 11.774384000 | 7.777290000 |
| 1 | 6.195607000  | 11.170718000 | 7.117875000 |
| 1 | 4.945050000  | 11.001234000 | 5.882895000 |
| 1 | 4.047512000  | 10.775999000 | 8.207166000 |
| 1 | 4.557440000  | 12.432389000 | 8.601318000 |
| 1 | 3.279040000  | 12.156517000 | 7.390277000 |
| 6 | 6.426061000  | 13.844213000 | 6.948234000 |
| 6 | 7.330111000  | 14.858991000 | 6.246700000 |

|   |             |              |             |
|---|-------------|--------------|-------------|
| 1 | 7.040328000 | 13.248713000 | 7.646100000 |
| 1 | 5.701206000 | 14.396662000 | 7.586463000 |
| 1 | 7.868139000 | 15.462927000 | 6.995403000 |
| 1 | 8.075332000 | 14.350961000 | 5.613003000 |
| 1 | 6.761994000 | 15.556644000 | 5.610834000 |
| 1 | 8.313610000 | 11.745262000 | 4.909102000 |

$4[2]^{2+}$

Spin multiplicity : Quartet / Charge : 2+

|    |              |             |              |
|----|--------------|-------------|--------------|
| 27 | 10.998632000 | 3.565362000 | 3.183807000  |
| 7  | 11.271078000 | 3.535452000 | 0.862584000  |
| 7  | 9.720715000  | 5.072524000 | 2.451071000  |
| 7  | 10.125495000 | 4.500802000 | 4.981854000  |
| 7  | 12.782604000 | 4.685571000 | 3.667769000  |
| 7  | 12.372449000 | 2.061074000 | 3.797571000  |
| 7  | 9.298170000  | 2.239782000 | 3.167646000  |
| 6  | 10.477978000 | 4.372589000 | 0.303302000  |
| 1  | 10.398013000 | 4.465097000 | -0.790005000 |
| 6  | 9.619906000  | 5.247817000 | 1.124745000  |
| 6  | 8.746428000  | 6.190639000 | 0.576966000  |
| 1  | 8.679143000  | 6.318520000 | -0.505263000 |
| 6  | 7.968501000  | 6.954351000 | 1.455562000  |
| 1  | 7.272904000  | 7.701561000 | 1.067137000  |
| 6  | 8.082111000  | 6.758130000 | 2.831290000  |
| 1  | 7.477014000  | 7.347699000 | 3.520341000  |
| 6  | 8.985562000  | 5.790229000 | 3.308157000  |
| 6  | 9.214389000  | 5.471792000 | 4.743723000  |
| 6  | 8.550701000  | 6.119319000 | 5.792394000  |
| 1  | 7.819436000  | 6.902489000 | 5.590811000  |
| 6  | 8.838373000  | 5.748157000 | 7.107863000  |
| 1  | 8.330119000  | 6.241193000 | 7.939905000  |
| 6  | 9.779818000  | 4.745002000 | 7.340950000  |
| 1  | 10.035379000 | 4.424369000 | 8.352698000  |

|   |              |              |              |
|---|--------------|--------------|--------------|
| 6 | 10.401925000 | 4.148322000  | 6.241467000  |
| 1 | 11.147236000 | 3.359577000  | 6.379366000  |
| 6 | 12.056901000 | 2.656899000  | 0.038568000  |
| 6 | 11.477651000 | 1.465721000  | -0.465222000 |
| 6 | 12.291237000 | 0.617683000  | -1.234681000 |
| 1 | 11.866437000 | -0.303974000 | -1.640054000 |
| 6 | 13.623845000 | 0.929100000  | -1.498336000 |
| 1 | 14.236391000 | 0.252996000  | -2.100960000 |
| 6 | 14.171878000 | 2.110661000  | -0.996600000 |
| 1 | 15.213008000 | 2.354121000  | -1.219136000 |
| 6 | 13.408564000 | 2.995259000  | -0.221442000 |
| 6 | 10.012431000 | 1.097554000  | -0.237601000 |
| 1 | 9.610411000  | 1.770851000  | 0.531417000  |
| 6 | 9.836449000  | -0.336797000 | 0.291121000  |
| 1 | 10.136434000 | -1.090251000 | -0.455112000 |
| 1 | 8.777809000  | -0.521363000 | 0.537266000  |
| 1 | 10.431998000 | -0.506565000 | 1.202049000  |
| 6 | 9.181527000  | 1.315846000  | -1.517664000 |
| 1 | 9.244546000  | 2.358143000  | -1.869505000 |
| 1 | 8.119884000  | 1.081791000  | -1.333399000 |
| 1 | 9.534508000  | 0.664327000  | -2.334437000 |
| 6 | 13.997950000 | 4.319559000  | 0.255538000  |
| 1 | 13.407250000 | 4.640131000  | 1.125584000  |
| 6 | 13.846394000 | 5.409389000  | -0.825296000 |
| 1 | 14.414459000 | 5.142494000  | -1.732254000 |
| 1 | 14.228489000 | 6.375435000  | -0.455774000 |

|   |              |              |              |
|---|--------------|--------------|--------------|
| 1 | 12.794518000 | 5.551798000  | -1.120424000 |
| 6 | 15.460927000 | 4.209998000  | 0.712629000  |
| 1 | 15.593663000 | 3.413221000  | 1.461786000  |
| 1 | 15.783995000 | 5.160583000  | 1.166599000  |
| 1 | 16.141448000 | 4.002917000  | -0.129178000 |
| 6 | 12.886365000 | 6.018798000  | 3.598157000  |
| 1 | 12.036596000 | 6.557273000  | 3.170406000  |
| 6 | 14.014967000 | 6.707630000  | 4.042595000  |
| 1 | 14.056232000 | 7.795620000  | 3.964955000  |
| 6 | 15.070041000 | 5.970867000  | 4.585127000  |
| 1 | 15.970270000 | 6.470187000  | 4.951248000  |
| 6 | 14.962874000 | 4.581755000  | 4.656864000  |
| 1 | 15.777193000 | 3.993982000  | 5.080082000  |
| 6 | 13.798097000 | 3.961194000  | 4.183437000  |
| 6 | 13.588269000 | 2.490397000  | 4.209305000  |
| 6 | 14.571383000 | 1.583012000  | 4.625586000  |
| 1 | 15.549463000 | 1.933344000  | 4.954157000  |
| 6 | 14.289945000 | 0.216443000  | 4.609822000  |
| 1 | 15.048165000 | -0.502629000 | 4.928897000  |
| 6 | 13.033592000 | -0.213682000 | 4.180395000  |
| 1 | 12.769259000 | -1.272299000 | 4.150207000  |
| 6 | 12.104331000 | 0.747235000  | 3.783150000  |
| 1 | 11.108410000 | 0.455067000  | 3.443927000  |
| 6 | 8.310557000  | 1.647670000  | 3.275563000  |
| 6 | 7.071777000  | 0.902883000  | 3.406025000  |
| 1 | 6.954940000  | 0.229799000  | 2.542716000  |



|   |             |             |             |
|---|-------------|-------------|-------------|
| 1 | 6.222530000 | 1.602250000 | 3.442873000 |
| 1 | 7.095314000 | 0.308069000 | 4.332054000 |

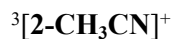

Spin multiplicity : Triplet / Charge : 1+

|    |              |             |              |
|----|--------------|-------------|--------------|
| 27 | 10.982837000 | 3.619018000 | 3.010927000  |
| 7  | 11.234596000 | 3.505935000 | 0.873670000  |
| 7  | 9.754837000  | 5.111439000 | 2.374942000  |
| 7  | 10.018418000 | 4.506347000 | 4.914163000  |
| 7  | 12.731037000 | 4.719481000 | 3.716950000  |
| 7  | 12.456352000 | 2.083137000 | 3.592673000  |
| 7  | 9.414699000  | 2.132123000 | 3.318941000  |
| 6  | 10.513070000 | 4.427399000 | 0.249776000  |
| 1  | 10.524678000 | 4.523169000 | -0.843424000 |
| 6  | 9.693577000  | 5.308998000 | 1.020550000  |
| 6  | 8.855975000  | 6.315043000 | 0.480651000  |
| 1  | 8.820066000  | 6.462644000 | -0.601752000 |
| 6  | 8.092471000  | 7.089722000 | 1.337697000  |
| 1  | 7.436401000  | 7.870004000 | 0.944783000  |
| 6  | 8.161554000  | 6.864430000 | 2.735126000  |
| 1  | 7.559371000  | 7.466681000 | 3.415749000  |
| 6  | 9.005135000  | 5.865626000 | 3.213944000  |
| 6  | 9.171998000  | 5.526112000 | 4.653350000  |
| 6  | 8.509840000  | 6.201669000 | 5.692301000  |
| 1  | 7.830455000  | 7.026468000 | 5.474645000  |
| 6  | 8.730944000  | 5.805695000 | 7.010829000  |
| 1  | 8.224215000  | 6.320601000 | 7.830999000  |
| 6  | 9.606355000  | 4.745406000 | 7.266463000  |
| 1  | 9.807354000  | 4.402088000 | 8.283389000  |

|   |              |              |              |
|---|--------------|--------------|--------------|
| 6 | 10.227191000 | 4.128148000  | 6.179222000  |
| 1 | 10.921171000 | 3.294865000  | 6.330970000  |
| 6 | 12.015643000 | 2.619147000  | 0.075013000  |
| 6 | 11.434938000 | 1.421066000  | -0.422884000 |
| 6 | 12.235973000 | 0.549214000  | -1.177431000 |
| 1 | 11.800790000 | -0.373232000 | -1.570805000 |
| 6 | 13.575022000 | 0.837835000  | -1.441984000 |
| 1 | 14.181537000 | 0.144671000  | -2.031808000 |
| 6 | 14.134099000 | 2.019289000  | -0.952545000 |
| 1 | 15.180856000 | 2.245074000  | -1.170781000 |
| 6 | 13.377438000 | 2.925330000  | -0.193522000 |
| 6 | 9.959935000  | 1.095857000  | -0.194840000 |
| 1 | 9.614617000  | 1.736066000  | 0.629161000  |
| 6 | 9.716403000  | -0.363089000 | 0.226516000  |
| 1 | 9.954546000  | -1.072711000 | -0.582849000 |
| 1 | 8.654992000  | -0.510402000 | 0.486782000  |
| 1 | 10.321455000 | -0.639757000 | 1.104779000  |
| 6 | 9.117177000  | 1.444906000  | -1.437998000 |
| 1 | 9.223509000  | 2.505438000  | -1.715366000 |
| 1 | 8.047861000  | 1.247708000  | -1.251892000 |
| 1 | 9.426116000  | 0.837938000  | -2.306095000 |
| 6 | 13.997060000 | 4.238240000  | 0.279985000  |
| 1 | 13.382475000 | 4.590971000  | 1.120514000  |
| 6 | 13.929408000 | 5.313910000  | -0.822898000 |
| 1 | 14.513931000 | 5.007514000  | -1.707215000 |
| 1 | 14.342303000 | 6.270253000  | -0.459661000 |

|   |              |              |              |
|---|--------------|--------------|--------------|
| 1 | 12.893903000 | 5.495188000  | -1.151044000 |
| 6 | 15.437912000 | 4.086222000  | 0.794243000  |
| 1 | 15.513878000 | 3.299909000  | 1.562215000  |
| 1 | 15.780424000 | 5.032623000  | 1.243887000  |
| 1 | 16.143514000 | 3.837036000  | -0.015491000 |
| 6 | 12.776708000 | 6.057075000  | 3.753823000  |
| 1 | 11.914736000 | 6.585626000  | 3.338346000  |
| 6 | 13.856030000 | 6.759470000  | 4.290109000  |
| 1 | 13.849503000 | 7.851190000  | 4.297599000  |
| 6 | 14.926384000 | 6.030071000  | 4.813808000  |
| 1 | 15.789323000 | 6.538481000  | 5.250757000  |
| 6 | 14.881634000 | 4.636604000  | 4.772319000  |
| 1 | 15.708579000 | 4.053804000  | 5.177863000  |
| 6 | 13.763547000 | 4.004275000  | 4.207048000  |
| 6 | 13.627527000 | 2.527586000  | 4.097812000  |
| 6 | 14.642814000 | 1.637594000  | 4.480176000  |
| 1 | 15.585583000 | 2.006804000  | 4.883678000  |
| 6 | 14.438411000 | 0.265846000  | 4.332231000  |
| 1 | 15.219241000 | -0.440817000 | 4.623689000  |
| 6 | 13.225920000 | -0.183243000 | 3.805837000  |
| 1 | 13.019885000 | -1.246677000 | 3.669194000  |
| 6 | 12.265930000 | 0.765491000  | 3.450541000  |
| 1 | 11.302835000 | 0.456549000  | 3.039047000  |
| 6 | 8.462940000  | 1.506795000  | 3.525109000  |
| 6 | 7.263762000  | 0.727548000  | 3.785749000  |
| 1 | 7.029628000  | 0.100472000  | 2.911932000  |

|   |             |             |             |
|---|-------------|-------------|-------------|
| 1 | 6.418249000 | 1.403880000 | 3.984469000 |
| 1 | 7.424166000 | 0.080928000 | 4.662082000 |

$^3[2]^+$

Spin multiplicity : Triplet / Charge :1+

|    |              |             |              |
|----|--------------|-------------|--------------|
| 27 | 11.184949000 | 3.951348000 | 2.941439000  |
| 7  | 11.304111000 | 3.665375000 | 0.843965000  |
| 7  | 9.739989000  | 5.165478000 | 2.307598000  |
| 7  | 10.059436000 | 4.495173000 | 4.806281000  |
| 7  | 12.999277000 | 4.739183000 | 3.639357000  |
| 7  | 12.180014000 | 2.217326000 | 3.670979000  |
| 6  | 10.509265000 | 4.506926000 | 0.192028000  |
| 1  | 10.504630000 | 4.562045000 | -0.903104000 |
| 6  | 9.627397000  | 5.333610000 | 0.952466000  |
| 6  | 8.671102000  | 6.232730000 | 0.426094000  |
| 1  | 8.596630000  | 6.370665000 | -0.655477000 |
| 6  | 7.836125000  | 6.914582000 | 1.297730000  |
| 1  | 7.087353000  | 7.611715000 | 0.914849000  |
| 6  | 7.940252000  | 6.691971000 | 2.694083000  |
| 1  | 7.266766000  | 7.206014000 | 3.380667000  |
| 6  | 8.902520000  | 5.804397000 | 3.162037000  |
| 6  | 9.110508000  | 5.438062000 | 4.585357000  |
| 6  | 8.385849000  | 5.997557000 | 5.649315000  |
| 1  | 7.629232000  | 6.760384000 | 5.462168000  |
| 6  | 8.644392000  | 5.567436000 | 6.949866000  |
| 1  | 8.087253000  | 5.991429000 | 7.789020000  |
| 6  | 9.623207000  | 4.590782000 | 7.164301000  |
| 1  | 9.856047000  | 4.224953000 | 8.166270000  |
| 6  | 10.307240000 | 4.088354000 | 6.057826000  |

|   |              |              |              |
|---|--------------|--------------|--------------|
| 1 | 11.084010000 | 3.327398000  | 6.178804000  |
| 6 | 12.129232000 | 2.784652000  | 0.081899000  |
| 6 | 11.635396000 | 1.495271000  | -0.258370000 |
| 6 | 12.471655000 | 0.628251000  | -0.978251000 |
| 1 | 12.107694000 | -0.364832000 | -1.252012000 |
| 6 | 13.759577000 | 1.010204000  | -1.357815000 |
| 1 | 14.394423000 | 0.318711000  | -1.919001000 |
| 6 | 14.231083000 | 2.278689000  | -1.020105000 |
| 1 | 15.237615000 | 2.574494000  | -1.327020000 |
| 6 | 13.436416000 | 3.184817000  | -0.299564000 |
| 6 | 10.211196000 | 1.073526000  | 0.100577000  |
| 1 | 9.909975000  | 1.677569000  | 0.971862000  |
| 6 | 10.088095000 | -0.407547000 | 0.494541000  |
| 1 | 10.246263000 | -1.076685000 | -0.367071000 |
| 1 | 9.076835000  | -0.612157000 | 0.882554000  |
| 1 | 10.814878000 | -0.687269000 | 1.273257000  |
| 6 | 9.228833000  | 1.399805000  | -1.043012000 |
| 1 | 9.238924000  | 2.470292000  | -1.298354000 |
| 1 | 8.198109000  | 1.128498000  | -0.758897000 |
| 1 | 9.489022000  | 0.833707000  | -1.953546000 |
| 6 | 13.964858000 | 4.583002000  | 0.011582000  |
| 1 | 13.319345000 | 5.002225000  | 0.796733000  |
| 6 | 13.849308000 | 5.504025000  | -1.219198000 |
| 1 | 14.467930000 | 5.127598000  | -2.051576000 |
| 1 | 14.192986000 | 6.523796000  | -0.976967000 |
| 1 | 12.809943000 | 5.571597000  | -1.577780000 |

|   |              |              |              |
|---|--------------|--------------|--------------|
| 6 | 15.403344000 | 4.580431000  | 0.554434000  |
| 1 | 15.508488000 | 3.907070000  | 1.420005000  |
| 1 | 15.688019000 | 5.595247000  | 0.877187000  |
| 1 | 16.132862000 | 4.264708000  | -0.209474000 |
| 6 | 13.297426000 | 6.045717000  | 3.633997000  |
| 1 | 12.549154000 | 6.715706000  | 3.201439000  |
| 6 | 14.495029000 | 6.540807000  | 4.149353000  |
| 1 | 14.698009000 | 7.613125000  | 4.125808000  |
| 6 | 15.410614000 | 5.633821000  | 4.688694000  |
| 1 | 16.360538000 | 5.980094000  | 5.102913000  |
| 6 | 15.097797000 | 4.274065000  | 4.698153000  |
| 1 | 15.798465000 | 3.555743000  | 5.123385000  |
| 6 | 13.872927000 | 3.850969000  | 4.163370000  |
| 6 | 13.427472000 | 2.433381000  | 4.149644000  |
| 6 | 14.217705000 | 1.374238000  | 4.616773000  |
| 1 | 15.225937000 | 1.554102000  | 4.989800000  |
| 6 | 13.699019000 | 0.079028000  | 4.601265000  |
| 1 | 14.302104000 | -0.757442000 | 4.962335000  |
| 6 | 12.403136000 | -0.128385000 | 4.124474000  |
| 1 | 11.953940000 | -1.122973000 | 4.100908000  |
| 6 | 11.681617000 | 0.973820000  | 3.664653000  |
| 1 | 10.665752000 | 0.855572000  | 3.279419000  |



$^2[2-H]^+$

Spin multiplicity : Doublet / Charge : 1+

|    |              |             |              |
|----|--------------|-------------|--------------|
| 27 | 10.918869000 | 3.590016000 | 3.140548000  |
| 7  | 11.399393000 | 3.606453000 | 0.784874000  |
| 7  | 9.847380000  | 5.099013000 | 2.452425000  |
| 7  | 9.987388000  | 4.385956000 | 4.989121000  |
| 7  | 12.640010000 | 4.557517000 | 3.581494000  |
| 7  | 11.958174000 | 2.055105000 | 3.807551000  |
| 6  | 10.702741000 | 4.549598000 | 0.276320000  |
| 1  | 10.693846000 | 4.769376000 | -0.803266000 |
| 6  | 9.849313000  | 5.387990000 | 1.133313000  |
| 6  | 9.071464000  | 6.421290000 | 0.600672000  |
| 1  | 9.098338000  | 6.622538000 | -0.472373000 |
| 6  | 8.272496000  | 7.172156000 | 1.465524000  |
| 1  | 7.651266000  | 7.985647000 | 1.084572000  |
| 6  | 8.278155000  | 6.869738000 | 2.826229000  |
| 1  | 7.660100000  | 7.444991000 | 3.515609000  |
| 6  | 9.083603000  | 5.819730000 | 3.299026000  |
| 6  | 9.159719000  | 5.417696000 | 4.728097000  |
| 6  | 8.432188000  | 6.049340000 | 5.748338000  |
| 1  | 7.763967000  | 6.882438000 | 5.528732000  |
| 6  | 8.574315000  | 5.594383000 | 7.060027000  |
| 1  | 8.017262000  | 6.071961000 | 7.869751000  |
| 6  | 9.435247000  | 4.524981000 | 7.318604000  |
| 1  | 9.577123000  | 4.138343000 | 8.329998000  |
| 6  | 10.121814000 | 3.952115000 | 6.244974000  |

|   |              |              |              |
|---|--------------|--------------|--------------|
| 1 | 10.806128000 | 3.112096000  | 6.401106000  |
| 6 | 12.217453000 | 2.787945000  | -0.045451000 |
| 6 | 11.761620000 | 1.477194000  | -0.347316000 |
| 6 | 12.578146000 | 0.657755000  | -1.137956000 |
| 1 | 12.241157000 | -0.349506000 | -1.393057000 |
| 6 | 13.814295000 | 1.105922000  | -1.610003000 |
| 1 | 14.436756000 | 0.451301000  | -2.226236000 |
| 6 | 14.252176000 | 2.389854000  | -1.289455000 |
| 1 | 15.221713000 | 2.732416000  | -1.660185000 |
| 6 | 13.475043000 | 3.256459000  | -0.502530000 |
| 6 | 10.390215000 | 1.008434000  | 0.130833000  |
| 1 | 10.170955000 | 1.575345000  | 1.049867000  |
| 6 | 10.337782000 | -0.485912000 | 0.482014000  |
| 1 | 10.439774000 | -1.125890000 | -0.409927000 |
| 1 | 9.368195000  | -0.729209000 | 0.946780000  |
| 1 | 11.133031000 | -0.765286000 | 1.191301000  |
| 6 | 9.296949000  | 1.358371000  | -0.899280000 |
| 1 | 9.276162000  | 2.436115000  | -1.125929000 |
| 1 | 8.301102000  | 1.072925000  | -0.520705000 |
| 1 | 9.466662000  | 0.821061000  | -1.847771000 |
| 6 | 13.996587000 | 4.656480000  | -0.181467000 |
| 1 | 13.347666000 | 5.086071000  | 0.595321000  |
| 6 | 13.916678000 | 5.580695000  | -1.412280000 |
| 1 | 14.553993000 | 5.204183000  | -2.229953000 |
| 1 | 14.260328000 | 6.597166000  | -1.157661000 |
| 1 | 12.887190000 | 5.655017000  | -1.797700000 |

|   |              |              |              |
|---|--------------|--------------|--------------|
| 6 | 15.423873000 | 4.636318000  | 0.393699000  |
| 1 | 15.494630000 | 3.974664000  | 1.271719000  |
| 1 | 15.719500000 | 5.650530000  | 0.708451000  |
| 1 | 16.162338000 | 4.294965000  | -0.349926000 |
| 6 | 12.877994000 | 5.871193000  | 3.453784000  |
| 1 | 12.078289000 | 6.474750000  | 3.018923000  |
| 6 | 14.077383000 | 6.461550000  | 3.851390000  |
| 1 | 14.220677000 | 7.536532000  | 3.726182000  |
| 6 | 15.070848000 | 5.650675000  | 4.405869000  |
| 1 | 16.023261000 | 6.075230000  | 4.731919000  |
| 6 | 14.828456000 | 4.283935000  | 4.540733000  |
| 1 | 15.586744000 | 3.631735000  | 4.974386000  |
| 6 | 13.598325000 | 3.762294000  | 4.118099000  |
| 6 | 13.221121000 | 2.337650000  | 4.225889000  |
| 6 | 14.068534000 | 1.340505000  | 4.725061000  |
| 1 | 15.079970000 | 1.587111000  | 5.049485000  |
| 6 | 13.606110000 | 0.027176000  | 4.803292000  |
| 1 | 14.253828000 | -0.763478000 | 5.189009000  |
| 6 | 12.303827000 | -0.253305000 | 4.383051000  |
| 1 | 11.894424000 | -1.264355000 | 4.428764000  |
| 6 | 11.516042000 | 0.787522000  | 3.893161000  |
| 1 | 10.495175000 | 0.612196000  | 3.553847000  |
| 1 | 9.700092000  | 2.712617000  | 2.895252000  |

$^2[2\text{-NH}]^+$

Spin multiplicity : Doublet / Charge : 1+

|    |              |             |              |
|----|--------------|-------------|--------------|
| 27 | 11.138865000 | 4.315722000 | 3.452565000  |
| 7  | 11.228660000 | 3.819955000 | 0.331929000  |
| 7  | 9.679948000  | 5.267205000 | 2.385423000  |
| 7  | 9.885422000  | 4.716416000 | 5.025985000  |
| 7  | 13.078554000 | 4.735494000 | 3.654372000  |
| 7  | 11.818596000 | 2.447090000 | 3.534534000  |
| 6  | 10.447738000 | 4.894864000 | 0.093480000  |
| 1  | 10.428922000 | 5.252503000 | -0.937356000 |
| 6  | 9.645937000  | 5.572833000 | 1.039623000  |
| 6  | 8.755038000  | 6.576201000 | 0.549398000  |
| 1  | 8.773673000  | 6.819138000 | -0.515265000 |
| 6  | 7.877943000  | 7.197904000 | 1.406644000  |
| 1  | 7.187852000  | 7.962993000 | 1.044387000  |
| 6  | 7.871813000  | 6.824074000 | 2.769427000  |
| 1  | 7.176331000  | 7.301238000 | 3.458451000  |
| 6  | 8.777925000  | 5.870386000 | 3.220348000  |
| 6  | 8.823731000  | 5.467438000 | 4.654735000  |
| 6  | 7.837434000  | 5.818467000 | 5.589718000  |
| 1  | 6.971472000  | 6.409169000 | 5.292718000  |
| 6  | 7.964408000  | 5.387515000 | 6.909710000  |
| 1  | 7.200947000  | 5.650771000 | 7.645794000  |
| 6  | 9.070744000  | 4.614330000 | 7.275849000  |
| 1  | 9.206085000  | 4.257317000 | 8.298535000  |
| 6  | 10.009464000 | 4.301039000 | 6.295803000  |

|   |              |              |              |
|---|--------------|--------------|--------------|
| 1 | 10.892447000 | 3.698974000  | 6.527052000  |
| 6 | 12.033364000 | 3.182615000  | -0.664036000 |
| 6 | 11.716147000 | 1.848165000  | -1.031168000 |
| 6 | 12.495337000 | 1.235927000  | -2.021527000 |
| 1 | 12.272188000 | 0.212171000  | -2.327941000 |
| 6 | 13.543638000 | 1.920394000  | -2.641546000 |
| 1 | 14.131798000 | 1.428242000  | -3.421029000 |
| 6 | 13.843755000 | 3.226674000  | -2.261260000 |
| 1 | 14.675815000 | 3.746920000  | -2.742535000 |
| 6 | 13.112205000 | 3.883206000  | -1.257104000 |
| 6 | 10.514532000 | 1.124601000  | -0.424377000 |
| 1 | 10.364722000 | 1.514909000  | 0.594543000  |
| 6 | 10.710824000 | -0.392298000 | -0.288669000 |
| 1 | 10.745334000 | -0.894063000 | -1.269298000 |
| 1 | 9.867723000  | -0.828991000 | 0.270260000  |
| 1 | 11.639258000 | -0.634942000 | 0.252346000  |
| 6 | 9.232990000  | 1.442333000  | -1.221666000 |
| 1 | 9.043909000  | 2.526031000  | -1.274641000 |
| 1 | 8.356975000  | 0.966615000  | -0.750496000 |
| 1 | 9.314058000  | 1.062405000  | -2.253938000 |
| 6 | 13.527895000 | 5.291040000  | -0.833192000 |
| 1 | 12.921783000 | 5.576409000  | 0.038500000  |
| 6 | 13.262360000 | 6.324713000  | -1.943936000 |
| 1 | 13.863655000 | 6.107087000  | -2.842359000 |
| 1 | 13.529496000 | 7.337218000  | -1.599077000 |
| 1 | 12.202557000 | 6.336497000  | -2.244848000 |

|   |              |              |              |
|---|--------------|--------------|--------------|
| 6 | 14.999429000 | 5.336976000  | -0.380967000 |
| 1 | 15.194657000 | 4.608701000  | 0.422021000  |
| 1 | 15.246676000 | 6.340242000  | 0.003121000  |
| 1 | 15.689958000 | 5.120672000  | -1.212363000 |
| 6 | 13.644239000 | 5.960499000  | 3.773715000  |
| 1 | 12.952240000 | 6.805600000  | 3.839378000  |
| 6 | 15.013571000 | 6.158705000  | 3.809326000  |
| 1 | 15.415884000 | 7.168299000  | 3.913129000  |
| 6 | 15.862055000 | 5.034750000  | 3.699556000  |
| 1 | 16.948035000 | 5.154082000  | 3.709516000  |
| 6 | 15.297131000 | 3.774367000  | 3.580461000  |
| 1 | 15.935294000 | 2.893341000  | 3.499608000  |
| 6 | 13.892589000 | 3.629929000  | 3.574596000  |
| 6 | 13.193577000 | 2.353899000  | 3.531602000  |
| 6 | 13.827080000 | 1.092905000  | 3.538103000  |
| 1 | 14.916230000 | 1.030942000  | 3.515748000  |
| 6 | 13.066564000 | -0.065101000 | 3.594144000  |
| 1 | 13.550137000 | -1.044558000 | 3.606849000  |
| 6 | 11.657600000 | 0.045199000  | 3.645542000  |
| 1 | 11.019668000 | -0.838875000 | 3.704729000  |
| 6 | 11.087894000 | 1.304228000  | 3.606282000  |
| 1 | 10.001207000 | 1.430931000  | 3.620767000  |
| 1 | 11.113857000 | 3.332793000  | 1.222545000  |

$^2[2\text{-H-NH}]^{2+}$

Spin multiplicity : Doublet / Charge : 2+

|    |              |             |              |
|----|--------------|-------------|--------------|
| 27 | 11.170782000 | 3.791543000 | 3.027648000  |
| 7  | 11.006437000 | 3.724839000 | 0.068266000  |
| 7  | 9.962937000  | 5.194357000 | 2.341915000  |
| 7  | 10.022401000 | 4.109257000 | 4.755882000  |
| 7  | 12.682040000 | 4.992626000 | 3.648453000  |
| 7  | 12.426479000 | 2.397507000 | 3.566955000  |
| 6  | 10.624488000 | 4.958014000 | -0.005790000 |
| 1  | 10.758554000 | 5.486251000 | -0.955691000 |
| 6  | 9.939134000  | 5.669162000 | 1.068503000  |
| 6  | 9.199355000  | 6.801402000 | 0.705184000  |
| 1  | 9.233063000  | 7.164329000 | -0.323764000 |
| 6  | 8.406032000  | 7.426123000 | 1.669748000  |
| 1  | 7.812188000  | 8.307001000 | 1.418458000  |
| 6  | 8.375975000  | 6.895092000 | 2.952345000  |
| 1  | 7.749695000  | 7.356394000 | 3.715423000  |
| 6  | 9.170516000  | 5.774703000 | 3.270494000  |
| 6  | 9.189801000  | 5.162870000 | 4.622071000  |
| 6  | 8.396793000  | 5.608515000 | 5.688623000  |
| 1  | 7.725714000  | 6.459827000 | 5.576399000  |
| 6  | 8.473460000  | 4.938304000 | 6.910804000  |
| 1  | 7.862770000  | 5.267213000 | 7.754752000  |
| 6  | 9.335943000  | 3.847479000 | 7.035088000  |
| 1  | 9.424991000  | 3.294645000 | 7.972373000  |
| 6  | 10.096687000 | 3.468864000 | 5.926420000  |

|   |              |              |              |
|---|--------------|--------------|--------------|
| 1 | 10.788006000 | 2.623188000  | 5.981473000  |
| 6 | 11.695594000 | 2.997753000  | -0.962353000 |
| 6 | 11.072481000 | 1.815659000  | -1.434772000 |
| 6 | 11.733224000 | 1.101863000  | -2.441064000 |
| 1 | 11.280571000 | 0.194872000  | -2.845961000 |
| 6 | 12.960973000 | 1.538584000  | -2.945202000 |
| 1 | 13.457777000 | 0.968296000  | -3.734534000 |
| 6 | 13.559889000 | 2.691558000  | -2.442058000 |
| 1 | 14.529818000 | 3.005968000  | -2.834279000 |
| 6 | 12.951004000 | 3.453465000  | -1.430983000 |
| 6 | 9.695665000  | 1.384030000  | -0.935030000 |
| 1 | 9.559605000  | 1.786980000  | 0.081674000  |
| 6 | 9.538375000  | -0.139606000 | -0.825195000 |
| 1 | 9.543189000  | -0.626974000 | -1.813351000 |
| 1 | 8.575133000  | -0.379958000 | -0.347741000 |
| 1 | 10.341630000 | -0.587152000 | -0.218595000 |
| 6 | 8.586820000  | 1.994727000  | -1.816375000 |
| 1 | 8.654955000  | 3.093692000  | -1.855265000 |
| 1 | 7.593279000  | 1.728487000  | -1.420562000 |
| 1 | 8.658058000  | 1.614833000  | -2.848999000 |
| 6 | 13.690823000 | 4.666476000  | -0.868654000 |
| 1 | 13.097608000 | 5.097231000  | -0.048996000 |
| 6 | 13.869559000 | 5.767676000  | -1.930376000 |
| 1 | 14.487559000 | 5.414228000  | -2.771713000 |
| 1 | 14.372035000 | 6.643211000  | -1.488446000 |
| 1 | 12.900513000 | 6.097876000  | -2.338156000 |



|   |              |              |              |
|---|--------------|--------------|--------------|
| 6 | 15.042730000 | 4.258443000  | -0.252752000 |
| 1 | 14.913576000 | 3.484965000  | 0.521091000  |
| 1 | 15.521934000 | 5.133544000  | 0.215306000  |
| 1 | 15.734422000 | 3.866421000  | -1.015735000 |
| 6 | 12.720915000 | 6.333142000  | 3.632867000  |
| 1 | 11.841592000 | 6.851483000  | 3.245566000  |
| 6 | 13.823322000 | 7.058474000  | 4.085035000  |
| 1 | 13.805387000 | 8.149250000  | 4.048835000  |
| 6 | 14.927685000 | 6.360061000  | 4.575800000  |
| 1 | 15.809580000 | 6.891842000  | 4.940409000  |
| 6 | 14.891948000 | 4.965193000  | 4.595098000  |
| 1 | 15.743624000 | 4.399577000  | 4.973566000  |
| 6 | 13.752820000 | 4.305012000  | 4.120663000  |
| 6 | 13.605528000 | 2.834720000  | 4.082192000  |
| 6 | 14.579229000 | 1.936110000  | 4.531572000  |
| 1 | 15.519866000 | 2.301635000  | 4.943340000  |
| 6 | 14.332723000 | 0.565310000  | 4.449603000  |
| 1 | 15.083240000 | -0.149492000 | 4.794810000  |
| 6 | 13.117431000 | 0.126890000  | 3.920711000  |
| 1 | 12.880732000 | -0.935355000 | 3.836282000  |
| 6 | 12.191858000 | 1.075345000  | 3.488303000  |
| 1 | 11.232631000 | 0.777998000  | 3.063983000  |
| 1 | 10.767779000 | 3.212627000  | 0.970890000  |
| 1 | 10.267720000 | 2.751291000  | 2.364004000  |

CH<sub>3</sub>CN

Spin multiplicity : Singlet / Charge : 0

|   |              |              |              |
|---|--------------|--------------|--------------|
| 6 | -2.066454000 | -0.000019000 | -1.057054000 |
| 7 | -2.066335000 | 0.000020000  | -2.216701000 |
| 6 | -2.066530000 | -0.000004000 | 0.400235000  |
| 1 | -1.032148000 | 0.000001000  | 0.776779000  |
| 1 | -2.583584000 | -0.895735000 | 0.777031000  |
| 1 | -2.583584000 | 0.895738000  | 0.777008000  |

Et<sub>3</sub>N

Spin multiplicity : Singlet / Charge : 0

|   |              |              |              |
|---|--------------|--------------|--------------|
| 6 | -2.465749000 | 0.355331000  | 0.152781000  |
| 1 | -2.889803000 | -0.662619000 | 0.147654000  |
| 1 | -2.175628000 | 0.615803000  | -0.878104000 |
| 1 | -3.262297000 | 1.053462000  | 0.456037000  |
| 6 | -1.248459000 | 0.428042000  | 1.076937000  |
| 1 | -0.844097000 | 1.465244000  | 1.051613000  |
| 1 | -0.450086000 | -0.209299000 | 0.658525000  |
| 7 | -1.511064000 | -0.050662000 | 2.428027000  |
| 6 | -2.544815000 | 0.646768000  | 3.187227000  |
| 1 | -2.630231000 | 0.139522000  | 4.163601000  |
| 1 | -3.516445000 | 0.487766000  | 2.684907000  |
| 6 | -2.379343000 | 2.159393000  | 3.420595000  |
| 1 | -2.318691000 | 2.715156000  | 2.470378000  |
| 1 | -3.251911000 | 2.548364000  | 3.972208000  |
| 1 | -1.478526000 | 2.396411000  | 4.007200000  |
| 6 | -0.339777000 | -0.511703000 | 3.163493000  |
| 1 | -0.695922000 | -0.998278000 | 4.088858000  |
| 1 | 0.134996000  | -1.310165000 | 2.562431000  |
| 6 | 0.747080000  | 0.515515000  | 3.528835000  |
| 1 | 0.380106000  | 1.275652000  | 4.236065000  |
| 1 | 1.602105000  | 0.004815000  | 4.003731000  |
| 1 | 1.128401000  | 1.038141000  | 2.635996000  |

[Et<sub>3</sub>NH]<sup>+</sup>

Spin multiplicity : Singlet / Charge : 1+

|   |              |              |              |
|---|--------------|--------------|--------------|
| 6 | -2.434586000 | 0.407370000  | 0.120586000  |
| 1 | -2.911663000 | -0.583884000 | 0.051143000  |
| 1 | -2.060939000 | 0.671799000  | -0.880263000 |
| 1 | -3.196221000 | 1.150543000  | 0.398498000  |
| 6 | -1.254415000 | 0.393216000  | 1.078605000  |
| 1 | -0.828152000 | 1.395581000  | 1.209528000  |
| 1 | -0.459306000 | -0.267839000 | 0.705587000  |
| 7 | -1.606564000 | -0.135302000 | 2.450767000  |
| 6 | -2.680791000 | 0.650651000  | 3.182784000  |
| 1 | -2.887155000 | 0.074918000  | 4.096046000  |
| 1 | -3.574756000 | 0.588086000  | 2.548151000  |
| 6 | -2.351463000 | 2.097484000  | 3.507861000  |
| 1 | -2.083545000 | 2.682724000  | 2.615462000  |
| 1 | -3.256000000 | 2.552542000  | 3.939984000  |
| 1 | -1.547864000 | 2.191227000  | 4.251183000  |
| 6 | -0.378123000 | -0.471586000 | 3.288661000  |
| 1 | -0.759074000 | -0.691258000 | 4.295689000  |
| 1 | 0.005983000  | -1.410171000 | 2.863247000  |
| 6 | 0.728194000  | 0.570727000  | 3.327807000  |
| 1 | 0.403000000  | 1.532906000  | 3.744968000  |
| 1 | 1.519416000  | 0.174808000  | 3.983534000  |
| 1 | 1.178179000  | 0.743229000  | 2.339691000  |
| 1 | -2.045257000 | -1.049982000 | 2.284960000  |

H<sub>2</sub>

Spin multiplicity : Singlet / Charge : 0

|   |              |             |             |
|---|--------------|-------------|-------------|
| 1 | -1.182459000 | 0.897436000 | 0.000000000 |
|---|--------------|-------------|-------------|

|   |              |             |             |
|---|--------------|-------------|-------------|
| 1 | -1.944036000 | 0.897436000 | 0.000000000 |
|---|--------------|-------------|-------------|
